# Supplementary material for: Whole-Genome Sequencing of Six Neglected Arboviruses Circulating in Africa Using Sequence-Independent Single Primer Amplification (SISPA) and MinION Nanopore Technologies
Source: MDPI journal article supplement (doi:10.3390/pathogens11121502), 2022-12-08
Supplement: s1 [file s1]

## Suppl. Table S1 RT-qPCR Protocol for MIDV and WSLV

### S1.1 Primer sequences

|      |           |                               |     |
|------|-----------|-------------------------------|-----|
| MIDV | MIDV_PA_f | ACCATGCTAACGCGAGGGCGTTTTTCGCA |     |
|      | MIDV_PA_r | CGGCGCGCTGCCTATRTCCAGGAT      |     |
|      | MIDV_PA_p | TAATWGAAGGAGAGGTGGAAGTGGGC    | FAM |
| WSLV | WESSV_f   | GAAAGGAGTAGAAGAAAGGAGATTC     |     |
|      | WESSV_r   | TAGGTTCTTCACTCTAGCCGCTA       |     |
|      | WESSV_p   | CAACAAAGGGGATGAATAAGTCTCG     | HEX |

### S1.2 Primer/Probe mixes

|      |        |                            |
|------|--------|----------------------------|
| MIDV | 16 µl  | MIDV_PA_f (100 µM)         |
|      | 16 µl  | MIDV_PA_r (100 µM)         |
|      | 2 µl   | MIDV_p_Probe FAM (100 µM)  |
|      | 166 µl | 0.1 x TE Buffer            |
|      | 200 µl | total                      |
| WSLV | 16 µl  | WESSV_f (100 µM)           |
|      | 16 µl  | WESSV_r (100 µM)           |
|      | 2 µl   | WESSV_p_Probe HEX (100 µM) |
|      | 166 µl | 0.1 x TE Buffer            |
|      | 200 µl | total                      |

### S1.3 Master-Mix

| Processing steps | Master Mix                          | Volume       |
|------------------|-------------------------------------|--------------|
| 1.               | RNase free water                    | 3.5 µl       |
| 2.               | 2× RT-PCR Buffer                    | 12.5 µl      |
| 3.               | Primer-Probe-Mix 1: MIDV-Mix FAM    | 0.5 µl       |
| 4.               | Primer-Probe-Mix 2: WSLV-Mix HEX    | 0.5 µl       |
| 5.               | Primer-Probe-Mix 4: b-Actin Mix Cy5 | 2.0 µl       |
| 6.               | 25x RT-PCR Enzyme Mix               | 1.0 µl       |
|                  | <b>Total Volume Master Mix</b>      | <b>20 µl</b> |
|                  | <b>Total Volume</b>                 | <b>25 µl</b> |

AgPath-ID™ One-Step RT-PCR Kit (Ambion)

### *S1.3 Cyclor program*

| Cyclor program        |      |        |
|-----------------------|------|--------|
| Reverse transcription | 50°C | 20 min |
| Activation Taq        | 95°C | 15 min |
| Denaturation          | 95°C | 30 sec |
| Annealing             | 55°C | 45 sec |
| Elongation            | 68°C | 45 sec |



45 cycles

## Suppl. Table S2 Generated genome sequences of all six viruses

### >Crimean-Congo hemorrhagic fever virus segment L (animal origin)

TCTGCAGATACTCCCCGTTACCCACGCCAACACAGAGAGCTCCAGTAGTGGTCTTTCCCTTTG  
CGAAACCATGGACTTCTTTAAGAAACCTTGATTGACTCGCGTGATTGCTGTCAATATGTGTCCA  
ACCCTAGGGGTTCAACATTTGATTATTGAGATCGTGCGGCAGCCTGGTGATGGGAATCAAGCT  
CGATCACAGCATAGCTGAGTTACCATGCCTAACAAAACAGATCACTCTCTATATCATATCGGT  
CATCAAACGCGCCCAACCGAGTCGGCAGCACGGAAGTATTACCAGGAGGAGCCTGAAGCCA  
GACTTGTTGGCCTGAACCTGGAAGATTATCTCAAGAGGATGCTGTCTGACAACGAGTGGGGAT  
CAACTCCCTAGAAGCATCTATGTTGCCAAAGAAATGGGCATTACCATCATTATTTGACTGTTG  
CCGCCAGTGATGAAGTGGAAGCAGGTTTTAAAGTTCGAGACGATGCTTTACAGCTGTGAACCTT  
TTGTACTCTGACAACAAACACACTTTGATGCGCTCAGAATACTGCCACAGTTTGAAAAACAGA  
TACAAGAGAGGCCTTGAGCTTGATGGACAGGGTTATAGCTGTGGATCGCTAACATCATCTTCT  
AGTGATGAACTGCAAGACTATGAAGACTTGCCTTGGCACTTACAAGCGCAGTAGCTGGGAAT  
CAAATAGATTTCCGGTCAAGCTTCTTGATGAGTCACATTGTCCAAGAAGCAAGCAGAGTTAC  
TAAGGCAAAAAGCATCTCAGTTGTCTAAATTGGTCAATAAACAGAACATACCGACCACAGAG  
TCGGAAAGAGTCTTGGAATTGTATGTTCAACTGCAAATTATGTGTTGAGATATCAGCTGACACTT  
TAATTTTGAACCAGACATGCCAAAAACAAATCAGAAATGACAGGTGAAAGCATGTCATCACG  
ACAGTTGGGGCAACTTTAAACCGCTGACACGTAGACAAACAAAAGGTTAAGCAAGACTTCGT  
CCAGAATGAACTCTACGTCACTAAAGACTACTTTGCCTTGACCATCTAGCGACGTCCTGGTG  
GGCTTTTGAGGGCTGCTTTCCCTGGAACAGGAATAGAGAGGCATATGCAGCTGCTACACTCTG  
AGATGATACTGGACATCTGCACTGTATCACTTGGTGTCTATGCTGTCTACATTCTTATATGTTTCT  
AATAATAAAAACAAGAAGAAATTTATTACCAACTGTCTGCTCAGCACAGCCCTGTCCGGAAA  
GAAGGTGTATAAAGTTCTCGGCAATCTAGGAAATGAACTGTTGTACAAGGCACCTAGAAAGG  
CCTTAGCAACTGTCTGCAGTGCCTTGTTTGTTAAGCAGATAAACAACACTTCAGAATTGCTTCA  
GGACCATAAGCCCTGTCAGCTTACTTGCAATTGANAAATCTAGACTTTGATTGTCTCAGTGTAC  
AAGACTATAACGGTATGATAGAAAACATGTCTAAATTAGACAACACTGATGTTGAATTCAAC  
CACAGGGAGATAGCTGATCTCAATCAACTAATTCTCGGCTTATCACATTAAGAAAGGAGAA  
AGACACTGACCTCCTCAAACAATGGTTTCCTGAAAGTGACCTACCCGCAGAAGCACCAGGA  
ATGCTGCAAACGCGGAGGAATTTGTTATATCTGAGTTCTTTAAGAAGAAGGACATTATGAAAT  
TCATCAGCACTTCAGGCAGAGCAATGAGTGCAGGCAAGATTGGTAATGTCCTATCCTACGCA  
CATAATCTTTACTTGAGTAAGTCAAGCCTAAATATGACCTCTGAAGACATCTCACAGCTTTTG  
ATCGAGATTAAGCGACTGTATGCTTTACAAGAAGATTCTGAAGTGGAGCCGATAGCCATAATT  
TGTGATGGCATAGAAAGCAACATGAAACAGTTGTTTGCTATATTGCCTCCTGACTGTGCAAGA  
GAGTGTGAAGTCCTCTTCGATGACATAAGAAATTCTCCAACACACAGCACAGCCTGGAAGCA  
TACACTCCGATTAAAAGGGACTGCATACGAAGGTCTGTTTGCAAAGTGTTACGGCTGGCAATA  
CATTCCAGAAGACATTAAACCAAGCCTGACCATGTTGATACAGACTTTGTTTCCTGACAAGTT  
TGAAGATTTCTGGATCGAACCCAGTTGCATCCGGAGTTCAGAGACCTGACTCCCGACTTTTC  
GCTCACACAAAGGGTTCACCTTTAAAGAAATCGAATACCCAGTGTGCAAAATGTGCAAATCT  
CCATTGATGCGACGTTGCCTGAATCTGTGGAAGCAGTGCCGGTGACAAGAAAGAAAGATGTT  
CCACCTCTTCCTGAAACTCCGCTAAGTGNNGTGCATTCAATAGAGCGTATAATGGAAAACCTT  
ACCCGCTCATGCATGGAGGAGGGACTTTTGGCCAAGAAAAGAGAGTGGAGATCCGGGCGAG  
AACAGGGCAGCCAACAGAGTATCCACTGAACACGAGAGTTCTAGCATCTCTGCCTTTAAAGA  
CTACGGAGAGAGAGGGGATAGTCGAGGAGAAATTCACAGTGCCAGGTTTAGTGAAGAAGAT  
CAGCTAGAAACAAGNCAGCTGTTGTTGGTGGAAGCCTGGTTTCCAAACNGACATCGATGGGA

AAATAAGGACAGACCACAAGAAGTGGAAGACATATTAAAGCTATGACAGCTACTAGGAAT  
CAAGTGCTCATTTAGTTGCCTGTGCAGATTGCTCATCTACACCACCAGATAAATGGTGGATTTTC  
GGAGGACAGAGTGCAGTCCTAAAAAATTCAGTCAGCTTCTTGTTCAATAAACTCTCTAGAAA  
CTCACCTACAGAAGTAGCTGACATAGTTGTTGGAGCTATAAGTACTCAAAGGTTANGAGTT  
ACCTAAAGGCAGGAAGTGCACAAAAAACCCCTGTGTCTACTAAAGACGTTCTGGAGACTTGG  
GAAAAGATGAAGGAGCACATACTCAACAGGCCAACAGGACTGACACTGCCTACCAGTTTGG  
AACAGGCAATGCGCAAAGGACTGGTTCGAAGGTGTGGTCATCTCTAAGGAAGGTTCCGAGTCA  
TGTATCAATATGTTGAAGGAAAATTTGGACCGAATAACTGACGAATTCGAGCGAACAAAAATT  
TAAACATGAACTTACTCAGAATATTACCACAAGTGAGAAGATGCTTTTGAGTTGGTTGAGTGA  
AGACATCAAATCATCGAGATGTGGTGAGTGCTCTTAAGTATGAAGAAAACTGTTGATGAAA  
CTGCCAATCTATCAGAAAAGATTGAGCTACTCGCTTATAATCTGCAACTACTAATCACTGCA  
GCAACTGTCACCCCAATGGTGTAAGCATTAGTAACACTTCTAATGTGTGCAAGAGATGCCCCA  
AGATTGAAGTGGTTAGCCATTGTGAAAATAAAGGCTTTGAGGACAGCAATGAATGTTTAACA  
GACCTGGATAGGCTTGTTAGGCTCACATTACCAGGGAAAACTGAGAAGGAGAGAAGAGTCA  
AACGTAACGTGGAATATCTTATAAACTGATGATGAGCATGTCAGGCATTGATTGTATAAAAT  
ATCCACAGGGCAGCTTATCACCCATGGAAGAGTGAGTGCAAAAAATAACGATGGAAATTTG  
AAAGATAGAAGCGATGACGACCAAAGACTAGCTGAGAAGATAGACACTGTTAGGAAAAGAGC  
TTTCAGAATCTAACTGAAAGATTATTCAACTTATGCAAGGGGAGTGATATCAAATTCACTAA  
AAAACCTCTCAAGGCAAGGTAAATCAAAGTGTTCTGTGCCAAGATCTTGGCTCGAAAAGGTA  
CTGTTTGACCTGAAGGTACCTACTAAAGACGAAGAAGTACTTATAAATATCAGAACTCATTG  
AAAGCTAGATCCGAGTTTGTTAGAAATAACGATAAACTACTCATAAGGTCAAAGAAGAACT  
AAAAAAATGTTTCGACATGCAGTCTTTTAAATTGAAAAAAAACAAGCAACCTGTACCCTTTCA  
GGTGACTGTATACTGTTCAAAGAAGTGGCAGCTGAATGCATGAAGAGGTACATTGGCACAC  
CTTATGAGGGAATTGTAGACACCTTAGTTTCTCTGATTAATGTGTTAACAAGGTTTACTTGGTT  
CCAGGAAGTGGTCGCTAGATGGTCAAATATGTGAGGCCTTCCTAAGATGCTGCACAGAATTTA  
ATAGGTCAGGGGTCAAGCTGGTTAAGGTAAGGCACTGTAGAGCATTAAACCCTATCAGTTAAA  
TTCTTGCCATCAAATAAAAAGGAGAATATGTTATTATTTGTATTGCCACAAGGTTAATAGAA  
ACACGACAGAATCGAACAGCACCTCCAGACTCTGCAGATATCGGACCTTTTTCTGTATTTGA  
ACAGGGAGACAAAGCTGTCAGCAAGTTCTTCAGTTACACCCTTTACATTGCTAAGGTTTCATAG  
GGAAACACTTTATATACAAGTGCTGCAGCACCTGCCGGGCTCTGCGGAAGATCACGCAGCTT  
GGTACCAGGTGTCACAGAAGTTATAAACAGTGTGAGTGAAAAACATTTGCAAGACATTGAA  
AATCATTCCCATGACTCTACTAGAAGAAGATTGGAGCAAATTCAGGNAATACTCAGCTTTTGC  
TCTTGAAGGTGGGATTTGAAGAATCATATAAAATACGAACCTCAAGGTGCAGAGCCGAGTGG  
GAATTTTCTGAACAGGAGCAGTCAGAGACCACTTTATAAGTGTGTTTCGCCCCGATATCTG  
GGCTCCTGAAGGTCCTAGTTCGGATTCTATCGTGCTTCCTATTGGCATAAAAGAACAACCTTACT  
AGACAACTCTCAGCAACAGAACAAACAGCTACAGATGCTTCGTTTGTAACATGCTGGCAGAG  
CTAAATAGACTTATTTGGCCTAATGAGCTGCCAGGAAAGAAATTTTCGAATTGCGAAGCTGTA  
GGAAAGAATTGAAGACAACATTGCAAGGCTTTACCTGCAGAACATCCATATACTGTTCTGTTA  
GGGATGTGGAGGACAATGTTAAGCACTGGAACAAAGAGATCTATGTCCTGAGGTAACCATT  
CCATGCTTTACAGTCTATGGAACCTTTGTCAACAGCGATAGACAACTGATCTTTGACATTTACA  
ATNTGCATATATATAATAAAGAAATGGACAACTTTGATGAAGGATGTATCAGCGTCTTGGAA  
GAAACAGCAGAAAGACATATGCTTTGGGAACTCGATCTGTTGAACTCACTTTGTTCTGACGAA  
AAGAAAGATACCAGAACCGCAAGACTATTACTAGGCTGCCCAAATGTGAGAAAAGCAGCAA  
ACAAAGAAGGGAAGAAGCTGTTGAAGTTAAACAGCGACACATCCACAGACACACAGAGCAT  
TGCTTCTGAAGTGTGCGACAGAAGTCTTATAGTTCAAGTAAGAGTAGAATCCGTAGTATATTT  
GGTAGATACAACTCTCAGAAGAAACCATTTGAATTAAGGTCAGGTCTTGAGGTTTTCAATGAT

CCTTTCAATGATTACCAGCAAGCAATAACGGACATTTGCCAATTTTCTGAGTACACACCAAAC  
AAAGAAAGCATTGAAAGACTGTCTTCAAATCATACGAAAAACCCTAGCCACACAATGGG  
TTCTTTTGGAGCTGATCCAGGCAATCTCAGAGTTCGGCATGAGCAAGTTTCTCCCGGAAAAATA  
TAGACAAAGCAAGAAGGGATCCGAAGAACTGGGTAGCATCTCTGAAGTAACCGAAACAAC  
AAGCATAGTTGCATCACCTAGAACTCATATGATGCTCAAGGATTGTTTTAAAATTATACTAGG  
TATTGAGAATAAGAAGATAGTCAAAATGCTTCGAGGGAAGTTAAAGAACTCGGTGCTATCT  
CAACAAACATAGAGATTGGGAAAAGGGATTGCCTAGATCTACTTAGCACAGTAGATGGGCTA  
ACAGACCAGCAAAAAGAAAATATTGTAAATGGAATATTTGAACCCTCAAAGTTATCCTTCTA  
CCATTGGAAGGAATTAGTCNNAAAAAACATTGATGAAGTTTTACTTACTGAAGATGGAAATC  
TGATCTTCTGCTGGTTGAAAACAATCTCCTCTTCAGTCAAAGGGAGCCTAAAGAAGAGACTCA  
AATTCATGAATGTACATTCTCCAGAATTGATGCCGGAAGTGTCTCTTTTCTAGTGAGGAATT  
CAATGAGTTAATTAAGTTAAAGAACTCCTCCTCAATGAACAACAAGATGAACAGGAGCTGA  
AACAAGATCTTTTGATATCTTCTTGGATCAAGTGCATAACAGCTTGTAAGATTTTGCAAGCAT  
CAATGACAAGATTCAGAAGTTCATTTACCACCTGTCTGAAGAGCTATATGACATAAGGCTGCA  
GCACCTGGAAGTGTCAAAGCTTAAGCAAGAGCATCCTAGTGTGAGCTTCACAAAAGAAGAGG  
TCTTAATAAAGCGGCTGGAGAAAAATTCCTTAAGCAGCATAATCTAGAGATTATGGAACT  
GTGAATCTTATATTCTTTGCAGCCCTCTCAGCTCCTTGGTGCTTACACTATAAAGCACTAGAGT  
CTTATTTGGTAAGACATCCAGAAATACTTGACTGTGGAAGTAAAGAGGACTGCAAACCTCACTT  
TGCTTGATCCTGTCAGTTTCTAAGCTCTTGGTTTGTGTTGTATCAAAAAGATGATGAGGAAGTGA  
CGAATAGCTCAAGTTCCTGAACTTGGGTTTCTTAGTGAAATATGCTGTCACCTTGTTACAC  
ATCTATATGGCAAACCTTTTCAATCATATCTGCAATGAGCTCCGGCAGGTGCTGCTCGGATTCT  
ATCGTATTTATGGCACAAGACTACTGACGAAAAGCCACTACATCAAACAAGATAGTTTTTA  
AAGCTAAAATTGGTTTATCTGGGAACAAAGTTATGACTTTATTTCGGATCTTCATCTAAAAATG  
ATAGCAACAGCGGTACCTTTTAACGTCTGCAAGAGATTAACGAAGAGTGACTGGGGAAAGGT  
CTTGAGCGCGTTAGCTTGTAGGTCATATGAGATGGTAGTGCTAGTGGGTGCTCCGGTGCATG  
GCAATACTACGAACAAATTACCTATTGCATGGAAAGTACCAAATTAGGGAAGCACCGATACA  
TATCCAACTTAGCACCAAAAGCTCTGCAAATAACAGGAGCAAGAGATTTGTTAGTGCAGGG  
AGACTGGGACTACTAAAGTTATGCATGCAAACCACTGAAATGTTTAGCAGAAATCTTTTGAA  
AACAACATCGGATGATGGCCTCACAACCCACATCCCCGTGTGCAAAGAAACAATCCTCAAT  
GTGGGATTAGACTGTCTTGCTAACATGCGAAATCTTGACGGTAAGCCCATAAGTGAAGGCAGT  
AATTTGGTCAATTTTACAAAGTCATATGCATCTCGGGTGATAATACCAAGTGGGGCCTGATA  
CACTGCTGTTCTTTCTTTCTGGCATGATGCAACAGGTTCTNAAAAATGTACCAGATTGGTGTT  
CATTTTATAAATTAACATTCATAAAAAACTTGTGTAGACAGGTAGAAATACCTGCTGGCAGCA  
TCAAAAAGATCTTAAATGTTCTTGAGATACAGATTGTGCAGCAAGGGAGGTGTAGAACAACA  
CAGTGAAGAGGATCTGAGAAGACTGTTGACAGATAATTTAGACAGTTGGGACGGAAACGAC  
ACAGTTAAGTTCTTAGTTACAACCTTATATAAGCAAAGGTCTCATGGCGTTAAACAGTTACAAT  
CATATGGGTCAGGGTATTCACCATGCACACATCTTCGGTGCTAACTTCCTAGCTGCTGTGCTC  
TTTGAGGAGCTGGCAANTTTTATCTTAAGAGAAGCTTACCCAGACAACAGTACATGTTGAA  
CATGCCGGTAGTTCAGATGATTATGCAAAGTGTATAGTGGTGACTGGTACACTATCCAAAGAG  
CTCTATTCCCAGTATGATGAAACATTTTGGAAACACTCTTGCAGACTCAAAAACCTCACGGCT  
GCAGTACAAAGATGCTGTCAAATGAAAGATAGTGCCAAAACCTTGGTGAGCGACTGCTTTCT  
CGAGTTTTACAGTGAGTTTATGATGGGTTACAGGGTAACCCCTGCTGTAATAAAGTTCATGTTT  
ACTGGACTGATAAACAGCTCTGTGACCTCTCCTCAGAGTTTGATGCAAGCATGCCAAGTTTCA  
TCCCAACAAGCAATGTATAATAGTGTTCTCTTGTACCAACACTGCCTTCACCCTATTAAGGC  
AGCAAATCTTCTTTAACCATGTTGAAGACTTTATCAGAAGGTATGGTATACTGACTCTTGGGA  
CTTTGTCACCCCTTGGTAGGTTGTTTCGTACCAACCTACTCTGGATTAGTCAGCTCAGCAGTTGC

TTTAGAAGATGCTGAAGTCATTGCTAGGGCAGCCCAAACACTTCAGATGAACAGTGTGTCAAT  
ACAGTCAAGTAGCTTGACCACATTAGATAGCCTAGGTCTAGTCCGACAAGTTCCACAGCTG  
AGGATAGCAGCAGTGTGAGTGATACTACTGCTGCTTCCCATGACTCAGGATCGTCATCTTCAA  
GCTTCTCTTTTGAGCTCAATAGACCCCTGTCTGAACTGAACTACAGTTTATTAAAGCACTAAG  
TAGTCTCAAGTCAACACAAGCCTGTGAAGTGATTCAAAATAGAATTACAGGTCTTTATTGCAA  
TAGCAACGAAGGACCTCTTGATAGGCATAATGTTATTTACAGCAGCAGAATGGCAGACTCTTG  
CGATTGGCTAAAGGATGGCAAAAGAAGAGGAAATCTAGAACTAGCGAATAGGATTCAATCT  
GTACTGTGTATTCTGATAGCAGGATATTACAGGTCAATTTGGAGGGGAAGGAACCGAGAAACA  
GGTAAAGGCATCATTGAATAGAGACGACAATAAAATCATAGAGGATCCTATGATACAACTAA  
TTCCAGAAAAGCTGAGGAGAGAGTTAGAAAAGGTTAGGTGTTTCTAGAATGGAGGTGATGAG  
CTAATGCCAAGCATTAGTCCTGATGACACTTTAGCCCAGCTTGTAGCAAAAAAACTCATCAGT  
CTCAATGTTTCGACAGAAGAATACTCAGCTGAAGTGTCTAGACTCAAACAGACACTGACAGC  
CCGAAATGTTTTGCACGGGTAGCTGGAGGAATTAAGGAGCTTTCGCTTCCAATATATACAAT  
ATTCATGAAATCTTACTTCTTTAAAGACAATGTCTTCTGTCACTAACAGATAGATGGTCTACC  
AAGCACAGTACAACTATCGTGATAGTTGTGGCAAACAATTAACAGGTAGAATAATTACCAA  
GTATACTCACTGGTTGGACACTTTTCTGGGCTGCTCTGTCTCCATCAACAGGCATACCACCGTT  
AAAGAGCCCTCCTTATTCAATCCGAATATCAGATGTGTGAATCTGATCACATTTGAGGACGGC  
CTGAGAGAACTGTCAGTGATACAGAGTCACCTTAAAGTCTTTGAAAATGAGTTCACCAACTTA  
AATCTTCAATTCTCTGATCCGAACAGACAGAACTTAGAATAGTTGAGTCCAGACCTGCAGA  
ATCCGAGCTAGAGGCAAACCGTGCAGTGATTGTCAAGACCAAATTGTTTTAGCAACTGAAC  
AAGTTCGGCTATCCAACAACCTGCAGTTGTCTGCTGGGCTACCTATTGGATGAATCTGCAATTT  
CTGAAGTCAAGCCTACCAAGGTTGACTTCTCAAATTTGCNNAAGACCGCTTCAAATAATG  
CAATTTTTCCCTTCAGTGTTCACTTTAATTAAGATGCTGACAGATGAATCGTCAGATTCAGAAA  
AGAGTGGCCTTAGTTCAGATTTGCAACAAGTTGCAAGATACTCAAACCACTTGACCTTGCTCA  
GCAGAATGATTCAACAAGCAAAGCCAACCGTGACTGTTTTCTACATGCTAAAAGGTAAGTTG  
ATGAACACAGAGCCAACAGTTGCTGAGCTTGTCTAGCTATGGTATAAAGGAAGGCAGATTTTTT  
AGGCTTTCCGACACCGGAATCGATGCAAGCACATACTCTGTAAAATATTGGAAAATTCTTCAC  
TGCATCTCTGCCATTGGATGTCTACCTTTGAGCCAAGCAGACAAGTCTTCACTACTTATGAGCT  
TCTTAAACTGGAGGGTCAACATGGACATTAGAACATCTGACTGTCCACTGTCTAGTCATGAAG  
CAAGTATATTGAGTGAATTTGATGGACAAGTCATCGCTAACATACTTGCCAGTGAATTAAGTT  
CTGTGAAACGAGATTCTGAACGCGAGGGTCTGACTGATCTCCTTGATTATCTAAACTCACCAA  
CTGAATTGTTGAAGAAAAAGCCTTACTTAGGGACAACGTGCAAGTTCAACACCTGGGGAGAC  
TCGAATAGATCTGGAAAGTTCACATACAGCAGCAGATCTGGAGAATCCATTGGAATCTTCATT  
GCAGGGAACTGCACATCCATCTCTCATCTGAGTCCATTGCCTTGTTGTGTGAACTGAAAGA  
CAAGTGCTTTCTTGATGAGCAAGAGGAGGACTGAGGTAATAACTAAAGAACAGCACCAACT  
GTTTTTAAGTCTTCTCCACAGTCTCATGAGTGTTTACAAAAGCACAAAGACGGAAGTGCACT  
ATCAGTCATACCTGATGGCAGCAATCCTCGATTACTTAAGTTTGTGCCCTCAAAAAAGGTCT  
AGCAGTGGTGAAAATCAAAAAACAAATTTTAACAGTGAAGAAGCAGGTTGTGTTTGATGCAG  
AGAGCGAGCCTAGACTGCAGTGGGGGCATGGCTGCTTGCCATTGTTTATGACAGAACTGAT  
ACTCAGACCACATACCATGAAAATCTCTGAAGGTGAAGCATCTTGTTGACTGCTCTACAGAT  
AGGAAGAAGCTTTTGCCCCAGTCAGTGTTTTCTGACTCCAAAGTTGTCCTTTCAAGGATCAAGT  
TCAAGACGGAGCTTCTCCTCAACTCATTGACGCTGCTCCACTGTTTCCTAAAACATGCTCCTAG  
TGATGCCATAATGGAGGTAGAGAGCAAAAGTAGCTTACTACACAAGTACCTCAAATCGGGAG  
GTGTCAGGCAACGGAACACTGAAGTGCTCTTCAGAGAGAAGTTAAACAAGGTTGTTATAAAA  
GACAATCTTGAGCAAGGTGTGGAAGAAGAGATTGAGTTTTGCAACAACCTGACTAAGACTGT  
TTCAGAGAACCCATTACCACTTAGCTGTTGGTCTGAAGTTCAAATTAATTGAAGACATAGG

CTTCAACAATGTTCTTGTTAACATTGACAGAAACACGGTGAAAAGTGAACCTTTATGGAAATT  
TACGTTAGACACCAATGTAAGCACCACAAGTACTATAAAAGACGTGAGGACATTGGTGTCTCT  
ACGTTAGCACTGAAACCATCCCTAAGTTCTTGCTTGCACTTCTACTTTATGAGGAGGTGTTAAT  
GAACTTGATCAACCAGTGTAAGGCAGTAAAAGAACTCATCAACAGCACAGGACTCTCAGACT  
CGGAACTGGAAAGCTTACTCACTTTATGTGCTTTCTATTTCCAAAATGAGTGCAGTAAGAGAG  
ATGGCCCTAGATGCTCCTTTGCAGCACTATTAAGTCTAATCCATGAGGAATGGCAGAGGATAG  
GTAAAAACATTCTTGTTCTGTGCAAACAATGAACTAGGTGATGTGTCACTTAAGGTTAACATTG  
TCTTGGTGCCTCTCAAGGACATGTCTAAGCCAAAGTCTGAGAGAGTGGTCATGGCCAGAAGG  
TCACTAAATCATGCTCTATCCTTGATGTTTTTAGACGAGATGTCATTACCTGAACTAAAATCCC  
TATCCGTGAACTGCAAAATGGGGAACCTTTGAAGGGCAGGAGTGCTTTGAGTTCACTATTCTGA  
AGGACAATAGCGCAAGGCTAGATTACAACAAGTTGATTGACCACTGTGTGGACATGGAAAAA  
AAGAGGGAAGCGGTTAGAGCAGTAGAGGATTTAATTTTAATGTTGACAGGCAAAGCAGTCAA  
ACCCAGTGCTGTGACACAGTTTGTACACGAGGACGAGCAGTGTCAAGAGCAAATAAGCTTAG  
ATGATCTGATGACAAACGACACGGTTACAGACTTTCCTGATAGGGAAGCAGAAGCCCTCAA  
ACAGGAAATCTTGCTTTAACTGGGATTCAGATTGAATATACC>

**Crimean-Congo hemorrhagic fever virus segment M (animal origin)**

TCTGNAGCGACACTACATGCGGCACGTCAGTACGTAAGTGTTAAGACTACTTTGGGTGTGTGT  
GAACAGCGATTTGTGAGGAACATGTTTCTCCACTTCAAATTTATGTTGTTGACTAACTTCTTCTT  
TTGTCAACTCCTATGGGGTGGCGGCAGGGGTTGCCAGTGGAGGCAGGACCAATACTAGCTCA  
ACACAAACTACCCTAACATCTTCAAACACTTCAAATAGTACAATGTCTGTGCTGGAGTCATCA  
ATAGGAACTGCCACAGAAACAGTGCCGAGCAGCACCACCAACACACCCGACACACAGGTCA  
CTACAGACAGTGGTTCTGGTGAATCCAGCACAGACCCCCAGACCACCAGCANNGAAGTACCT  
TCCACTTCTGACGCCACCATCAAAACACAAGAGTCAGAAACGCTCAGGGCTCAAAACCCAAG  
TACTACGGCTGGCTCAGGTGCATCCACTCCAAGCAACACCACATCAAATAAACAGATGTCA  
ACTACCCACATCACCAATCTTGAGGCAAAGTCATCACCCAGCCCTAGTAAAACATCGACG  
CCACAGACTGCACATCATCTCTCCAGAAGTCTTCTCTCAGCAGCAACTACAGAAACAGATCA  
AACAGCATCAGTAATGACTACAACCTAGAGAGACAACAACCATGAGCAGTCCAACAACAGTC  
AAAAACAGTGTAACAGCCATACCAACCCAAGGCATCACACCAGCAACACTTCGAAACAGA  
TTAACTACTACAACCCTAGGGACTCCCCTAAGATTCAAGCAACACAGAGTCAACAGACTGAAA  
CACCAGCAATCGCACCTGCCACAACCTGCTATTGCATTCATAAGCCCTACAAACAGATCTAAA  
AGGGAATCCAAGGTGCAAATAATTCTGACTTTCTCTCAAGGCCTCAAGAAATATTATAGCAA  
GATACTGAAACTCCTACACCTGACACAAGAAGAAGATTCTGAAGGTCTGCTTGAATGGTGCA  
CGCGGGTACTTGAACAGGCATGTGATGACGACTACTTCAATGAAAGAATAGGAGAATTTTC  
ATAACCGGAAAAGGCTACTTCAATGATGTTTTGCAGTTTAGGCTGTATGACACACTTAGTACC  
ACCGAATCAACCCAGAACACCTCACCCACAGCCAAGCCTTTCAGGTCATACTATGCCAAAGG  
GTCTCTTACCTTTGACTCAGGCTATTTCTCTGCTAAATGTTATCCAAGGGCATCTAACTCAGGA  
TTGCAGCTAATTAATGTCACACAACATTCAGTGAAAATAGCTAACACGCCAGGCCCCAAAAT  
ATCTAATCCTAAGACCATCAACTGTATAAACTTGAAAGTGCTCAACTGACAAGGATCATAGCA  
AGCTTGAGATCAACGTACTTCTACCACAAGTTGCTGTTAATCTTTCAAACTGCCATGTTTTAAT  
TGAATCACATGTCTGTGATTACTCTTTGGACACTGATGGGACAATAAAGCTCCCAAAAATTGC  
ACATAATGGGGCTTTTATACCAGGTACTTACAAAATTGTGATAGATAAGAAAAACAAATTAA  
ATGATAGGTGTGCACTATTCACCAGCTGCGTCATCAAAGGAAGAGAGGTCCGAAAAGGGCAG  
TCAGCTCTGAGGCAGTACAGAACAGAGATAAGAATCGGGCAAACATTTACAGGCTCGAGGA  
GATTGCTTGCAGAGGGGGGAAGCAACGATTGTGTTTCAAGAACCCAGCTAGTCAAAACAGAG

GTTGCAGAAATTCATGAAGACAGTTACGGTGGACCTGGCGAAAAAATCACAATTTGCAACGG  
CTCCACAATAGTAGATCAGAGGCTTGGCAGCGAATTAGGTTGCTATACAATAAACAGAGTGA  
GAACCTATAAGCTCTGTGAGAACAGTGCCACAGAAAAGAGCTGTGAAATAGACAGTGTTC  
GTTAAATGCAAACAGGGGTTCTGCCTCAAATAACTCAGGAAGGTAGGGGCCATGTGAAATT  
GTCTAGAGGGACAGAAATCGTTTTGGATGTCTGTGATACTAGCTGTGAACTGATGATACCCAA  
AGGCACTGGGGATATATTGGTGGACTGCTCAGGAGGGCAGCAACACTTTTTACAGGACAATC  
TAATTGACTTGGGATGCCCAAATATTCCATTGCTGGGTCAAACAGCAATATATGTTTGTAGAA  
TGTCAAACCATCCCAAGACAACCATGGCTTTTTCTGTTTTGGTTCAGTTTTGGCTATGTCATCAC  
ATGTGTAGTGTGCAAGGTGCTCTTCTATTTGCTAATTGTCATCGGGACACTAGGAAAAAAGCT  
GAAACAGTACAGAGAACTAAAGCCTCAGACATGTATTGTCTGTGAATCTATCCCGGTCAATG  
CAATAGATGCTGAAATGCACGATCTTAACTGCAACTACAACATATGCCCTTACTGTGCATCCA  
GACTGACCTCAGATGGTCTCGTCAGGCACGTAACCTCAATGTCCCAAACGGAAAGAGAAGGTC  
GAAGAACTGAACTATACTTAAACCTGGAGAGAATACCTTGGTTGGTGAGAAAACTCCTACA  
AGTGTCCGAGTCAACAGGAGTGGCTCTGAAGAGAAGCTGCTGGATGATCACACTCCTTATCCT  
GCTGACTGTTTCAATGTCACCAGTTCAGTCCGCACCAGTAGGCCACAAAAGGGCAGTTGAAG  
TCTATCAAATGAGAGAAGGCTATACAGGTATTTGCCTCTTCGTGTTGGGAAGTGTCTCTTCGC  
AGTCTCTTGGCTGGTGAAGGCCCTGATTGATAGCATCGGCAATAGTTTCTTCCCTGGGCTTTC  
ATATGCAAGACGTGTTCCATTGGTAGTATAAATGGATTTGAAATAGAGTCACACAAATGCTAC  
TGCAGTCTATTTTGCTGTCCTTACTGTAGGGCCTGCTCATCGGACAAAATCACTCACCAAATGC  
ATTTGAATGTGTGCAAAAAGAGAAAGGTGGGTAGTAATGTTATGCTAGCCGTTTGCAAACGC  
ATGTGTTTTAAAGCAACTATTGAAGCAAGCAACAGGGCCACTTTCATCAGAAACATCATAAA  
CTCCACTTTTGTATATGCATACTAATCCTGGTGATCTGTGTGGTTAGTACCTCTGCTGTCGACA  
TGGAAAATTTACCGGCAGGCGTTTGGGAAAAAGAGGAAGACCTAACAACTTCTGCCATCAG  
GAGTGCCAAAGTAACAGAAACTGAATGCCTTTGCCCATATGAAGCCTTAATGCTTAGAAAGCC  
ACTTTTCTTAGATAGTATAGCCAAGGGAATGAAAAGCTTGTTGAACTCCACAAGTTTAGAAAC  
GAGCTTGCAATTGAAGCTCCGTGGGGGGCAATCAATGTTCAATCAACTTTCAGACCAACAGT  
TTCAGCCGCCAATATAGCACTTAGCTGGAGTTCAGTTGAACACAAGGGCAACAAGATCTTAG  
TTTCAGGTAGATCAGAGTCAATTATGAAATTAGAAGAAAGAACTGGAATCAGCTGGTGTCTA  
GGTGTGGAAGATGCCTCTGAGTCAAAAACACTCACCGTCTCTGTTATGGATCTGTCTCAAATG  
TATTCTCCTGTTTTCGAGTACCTGTCAGGTGACCGACAGGTGGAGGAGTGGCCAAAAGCAACC  
TGCACAGGTGACTGTCCAGAAAGATGTGGCTGCACTTCATCAACCTGCCTGCATAAGGAGTG  
GCCGCACTCGAGGAACTGGCGCTGTAACCCCACTTGGTGTTGGGGGGTGGGAACTGGCTGCA  
CCTGCTGTGGGCTAGATGTAAAGGATCTCTTTACAGACTACATGTTGGTTAAATGGAAAGTGG  
AATATATAAAACAGAAAGCCATAATATGTGTTGAGCTTACTAGTCAAGAGAGGCAATGTAGT  
TTAATTGAAGCAGGCACAAGGTTTAAACCTAGGCCCTGTGACAATAACTCTATCAGAACCAAG  
GAACGTACAGCAGAGGCTTCCTCCCGAGATCATCACTGCACCCTAAGATAGAAGAAGGCT  
TTTTTGATTTGATGCATGTGCAGAAGGTAATGTCTGCAAACACGGTTTGTAAGCTGCAAAGCT  
GTACTCATGGTGTGCCTGGAGACTTACAAGTCTACCATGTTGGCAACTTGTTAAAGGGGGACA  
AAGTCAATGGGCACTCAATCCATAAGATAGAATCACATCTCAACACCTCATGGATGTCATGG  
GATGGGTGTGATTTAGACTATTTTTGCAACATGGGGGACTGGCCCTCATGCACATACACAGGG  
GTGACACAACACAACCATGCTGCATTCATCAACATGCTTAACATTGAGACTGATTACACAAA  
AACTTTCACTTTCATTCAAAAAGGGTCACAGCACACGGAGACACCCCTCAGTTGGACCTAA  
AAGCGAGACCAACATATGGTGCAGGCGAAATCACTGTTCTAGTAGAAGTTGCAGATTTAGAA  
CTGCACACGAAGAAAATTGAAGTGTGCGGTCTGAAATTCGCAAGTTTGTATGCTCCGGATGT  
TATGCTTGCAGCTCCGGCATCTCCTGCAAAGTTAGGATTCATGTAAATGAACCGGATGAATTC  
ACAGTACATGTAAAAAGTAATGACCCAGATGTTGTAGCAGCAGGATCAAGTCTCATGGCTAG



AAAGATAGAGTCTGGGGCCGACAGCACGTTTAAAGGCTTTTTCATCAATGCCAAAAAACTCTCT  
ATGTTTTTACATAGTAGAAAGAGATTATTGTAGCAGCTGTACAGATGATGACACTCAGAAATG  
TGTTGACATTAACTTGAACATCCACAGAGCATACTCATTGAACACAAAGGAACGATTATTG  
GCAAGCAAAATGACACCTGTCCAACTAAAACAAGCTGCTGGTTGGAATCTATTAAGAGTTTTT  
TTNATGGGCTTAAAAACATGCTGAGTGGGATCTTCAGTAATGTTTTCTTAGGCATGCTCCTGTT  
TCTTGCTCCTTTTGTATTGCTAATATTGTTTTTCTTCTTCGGGTGGAGACGTCGCTAGATGCCTTA  
AGTGCTGTAGAAGGACCAGAAAGCTGCTAAAGTATAAGCACCTTAGGGATGCGAAGAAGAG  
AGAGTGTTACAAAAAAATCATTGAAAGGCTAAATGACCACCAAAAAAGGCAAAAGTCGAT  
TGTTTGATGGAGAAAGGCTTGCAGACAGAAAAATTGCCGAACCTTTTTCAACTAAAACCTCATA  
GGTTGACGAATCAGACAAGCTGTTTTCTGCCACCAATATTCATCTTTAATGTTGCTACATACA  
TCTTCCCTAACCAACATGCCCAATTATCACATACCTGAACAGTGGAACCTACCTTAGATGAT  
AACACACACCTGCTTGAACTCGCAACAGGAACGCAGAAAACGTTAGTGGATTAACGCTCTT  
AATATCGTGTTTCCCTATTAACCTTAGCAATACG

**>Crimean-Congo hemorrhagic fever virus segment S (animal origin)**

TGTTCACTTCGATTTTGTCTCCATTGTTGCCTTGAGTGTTAGCAAAATGGAGAACAAAATCGA  
AGTGAACAACAAAGATGAGCTTAACAAATGGTTTGGGAGTTCAAGAAAGGAAACGGGCTTGT  
GGACACTTCACAACTCCTATTCTTCTGTGAGAACGTGCCAAACCTGACAGGTTTGTATCC  
AGATGGCTGGTGCAACCGATGATGCACAAAAAGACATTCCATCTATGCATCTGCCAAGGTTTT  
ATGAGGGAAACACCATAGAACTGTGCTCCTGATAGGCATGCACCTCGGGCCTGCGTTAGCCC  
CACAGATATANTNAAAAGAGGCCTTGAGTGGTTCGAAAAAAACACAGGAACCATTAAG  
TCTCTGGGATGAGAGCTACACTGAACTACTGGAAAGCTTGATGTGCTCCAAAATTTTGAACAG  
CTTGCCAACTACCAGCAGGCTGCTCTCAAGTGGAGGAAGGACATAGGGCTTCCGCGTCAATG  
CAAAACACAGCAGCCCTAAGCAATAACAAAGTCCTCTCTGAGTACAAGGTTCTGGGTGAGA  
TTGTAATGTCTGTCAAAGAGATGCTTTCAGACATGATCAGAAGGAGGAACCTCGATCTCTCAA  
CAGAGGGGGTGATGAAAACCAAGGGGCCAGTAAGCAAGGAGCACATAGAATGGTGCAG  
AGAGTTTGTCAAGGGCAAATACATAATGGCCTTCAATCCACCCTGGGGTGATGTCAACAAGTC  
CGGCCGCTCAGGAATAGCACTAGTTGCTACAGGTCTTGCCAACTTGCAAGAACAGAGGGAA  
AGGGAGTTTTTGAGGAGGCCAAAAAGACGGTGGAGGCCCTCAAGGAGTACCTTGACAAACA  
CAAAGATGAGGTAGACAAGGCCAGTGCTGATAGCATGGTAACAAACCTCCTCAAGCACATCA  
CCAAGGCCCAGGAACCTCTACAAGAACTCATCAGCACTGAGAGCACAGGGTGACAAATTGA  
CACCCCTTTCAGCTCCTTCTACTGGCTCTACAAAGCGGGCGTGAATCCAGAAACCTTCCCCAC  
TGTCTCTCAATTCCTNTTTGAGCTGGGAAAGCAGCCAAGAGGCACTAAAAAANTGAAGAAG  
CACTTCTGAGCACCCCAATGAAGTGGGGAAAGAAGCTTTATGAGCTCTTGCTGATGATTCTT  
TCCAGCAAAACAGGATCTACATGCACCCTGCTGTATTGACAGCTGGCAGAATCAGTGAGATG  
GGTGTCTGCTTTGGGACCATTCCTGTTGCCAATCCGGACGATGCAGCCCAGGGCTCGGGCCAT  
ACCAAGTCAATTCTGAACCTCCGAACAAATAGTGAACTAACAATCCCTGTGCCAAAACGAT  
TGTCAGCTTTTCGAGGTTGAGAAAACAGGATTCAACATACAGGACATGGACATTGTTGCCTC  
TGAGCATCTGCTGCACCAGTCTTGTGTTGGCAAGCAGTCCCCGTTCCAAAATGCTTACAACGT  
CAAAGGCAATGCCACCAGTGCCAACATCATCTAAATCTCCAAAATTTTTTTTTTATTGTTCCAG  
TTTGTGCTTCTGCTTCTAACCACAACCTAACAACCGCATTTGCTTTTTNNAGTTACCAAAACCTA  
TTTTATCTTGCTTTATTTCAATTTTACTTCATGCTATTATATTCTTCTTTTACATATTAAGGGCTGT  
GCGGCAACGATATCTTGACAG

**>Rift Valley fever virus segment L (animal origin)**

ACACAANGGCGCCCAATCATGGATTCTATATTATCAAAACAGCTGGTTGACAAGACTGGTTTT  
GTTAGAGTGCCAATCAAGCATTATGACTGTACAATGCTAACTCTGGCACTCCCAACATTTGAT  
GTCTCCAAGATGGTAGATAGAATTACCATAGACTTCAATTTAGACGACATACAAGGAGCATC  
TGAAATAGGCTCAACTTTGCTACCCTCTATGTGATAGATGTGGAAGATATGGCCAATTTTGT  
CACGATTTACCTTTGGCCACTTAGCTGACAAGACTGACAGACTCTTAATGCGTGAGTTTCCC  
ATGATGAATGACGGGTTTGATCATCTGAGCCCTGACATGATTATCAAACTACATCTGGCATG  
TATAACATCGTTGAGTTCACCACCTTTAGGGGGGATGAAAGAGGTGCATTCCAGGCTGCCATG  
ACTAACTCGCTAAGTATGAGGTTCTTTGTGAGAACAGATCTCAGGGCAGGACTGTTGTTCTT  
TATGTTGTTAGCGCCTACCGGCATGGTGTGTTGTTGTTCTAATTTGGAGCTAGAGGACTCTGAAGCA  
GAGGAGATGGTATATAGGTACAGACTTGGCCTTAGTGTGATGGATGAGCTAAGGACCTTGTTCC  
CCAGAACTGTCATCCACAGATGAGGAACTAGGAAAGACTGAGAGAGAGTTGCTAGCCATGGT  
CTCCTCCATCCAAATAAATTGGTCAGTCACAGAATCTGTGTTTCTCCTTTAGCAGAGAAATG  
TTTGACAGGTTGAGATCTTCTCCTCCCGATTGAGAGTACATCACGAGGATAGTGAGCAGATGC  
CTCATAAATTCTCAAGAGAACTCATCAATAATTCTTCTTTGCTGAAGGGAATGATAAAGTT  
TTGAGATTTTCAAAAAACGCTGAGGAGTGTTCCTTGGCAATAGAGAGAGCTTTAAATCAGTAT  
AGGGCAGAAGACAACCTTAGGGACCTAAATGACCACAAGTCTACTATTCAGCTGCCTCCCTG  
GCTGTCCTATCACGATGCCGATGGCAAAGATCTGTGCCCTCTCAGGGATTAGATGTGAGAGG  
AGACCATCCCATGTGCAACCTGTGGAGAGAAGTGGTTACCTCTGCAAATCTAGAGGAGATTG  
AGAGGATGCACGATGATGCAGCGGCAGAACTTGAGTTTGGCCTTTAGGGGTGAAGGACAGG  
CCAGATGAAAGAAACAGATACCATAGAGTCCATCTGAATATGGACTCAGATGATAGTGTCTA  
CATAGCTGCTTTAGGGGTTAATGGAAAGAAGCATAAAGCAGACACATTAGTGCAACAAATGA  
GAGACAGGAGCAAACAGCCCTTCTCTCCAGATCATGATGTGGATCACATATCTGAATTTCTCT  
CTGCATGCTCTAGTGACTTGTGGGCAACAGATGAGGACCTATACAACCCTCTCTCTTGTGATA  
AAGAGCTTAGATTGGCAGCTCAGAGAATTCATCAGCCATCCTTATCAGAAAGGGGCTTCAAT  
GAGATTATAACAGAGCACTACAGATTTATGGGAAGTAGGATAGGATCATGGTGCCAAATGGT  
CAGTTTAATAGGAGCTGAGCTATCAGCTTCTGTAAAGCAACATGTTAAGCCTAACTATTTTGT  
GATTAAACGACTACTAGGTTCTGGGATTTTCTTGCTGATCAAGCCTACTTCCAGCAAAAGCCA  
TATATTCGTGCTTTTTGCAATTAAGCGCTCTTGCTGGGCCCTTGATCTCTCCACTTCCAGGGTTT  
TCAAACCCTACATAGATGCCGGGGATCTGTTAGTTACTGACTTTGTTTCTTACAACTAAGTAA  
GCTTACCAACCTCTGCAAGTGCGTTTCGTTAATGGAATCCTCCTTCTCATTTTGGGCAGAGGCA  
TTTGGGATTCCAAGCTGGAACCTTTGTTAGTGACTTGTTCAGGTCTTCAGACTCTGCAGCAATGG  
ATGCCTCATAATGGGCAAACTCTCTTTATTAACCTTTTGGGAAGACAAAGCAAACTGAAG  
AGTTACAGACTATTGCAAGATATATAATCATGGAGGGCTTTGTCTCGCCCCCAGAAATCCCAA  
AACCTCACAAGATGACCTCTAAGTTTCCCAAGGTTCTCAGGTCAGAGCTGCAGGTTTACTTAT  
TAAACTGCTTATGCAGAACTATCCAGAGAATAGCAGGTGAGCCCTTATTCTTAAGAAGAAG  
GATGGGTCTATATCCTGGGGTGGCATGTTAATCCTTTTTCAGGGCGTCCACTGCTTGATATGC  
AACCCTCATCAGCTGTTGTTACAATGGTTACTTTAAAAACAAAGAAGAAGAGACTGAGCCT  
TCCTCCCTTTCTGGGATGTATAAGAAAATTATAGAAGTTGAGCACCTTAGACCACAGTCAGAT  
GCCTTCTTGGGTTATAAAGATCCAGAACTACCTAGAATGCATGAGTTCAGTGTTCCTACTTGA  
AGGAGGCTTGCAATCATGCTAAGCTGGTCTTAAGGAGTCTCTATGGACAGAATTTTCATGGAGC  
AAATAGACAACCAAATTAATCGAGAGCTCAGTGGGTTGACTCTAGAAAGATTAGCCACACTT  
AAGGCCACAAGCAACTTTAATGAGAATTGGTATGTCTATAAGGATGTGGCAGACAAGAATA  
CACAAGGGATAAATTATTAGTGAAGATGTCAAAATATGCTTCTGAGGGAAAGAGCCTAGCTA  
TCCAGAAGTTTGAGGATTGCATGAGGCAGATAGAGTCACAAGGATGTATGCACATTTGTTTGT  
TTAAGAAACAACAGCATGGAGGTCTGAGAGAGATCTATGTGATGGGTGCAGAGGAAAGAAT  
TGTTCAATCGGTGGTGGAGACAATAGCCAGGTCTATAGGGAAGTTCTTTGCTTCTGATACCCTC

TGTAACCCCCCAATAAGGTGAAAATTCCTGAGACACATGGCATTAGGGGCTCGGAAGCAATG  
TAAGGGGCCTGTGTGGACTTGTGCAACATCAGATGATGCAAGGAAGTGAACCAAGGCCATT  
TTGTTACAAAGTTTGGCCTCATGCTATGTGAGTTCACCTCTCCTAAGTGGTGGCCATTGATCAT  
TAGGGGATGTTCAATGTTTACCAGGAAAAGGATGATGATGAATTTGAATTATCTTAAGATCCT  
GGATGGTCATCGAGAGCTTGATATTAGAGATGACTTTGTGATGGATCTCTTCAAAGCTTATCAT  
GGTGAGGCAGAAGTTCCATGGGCTTTTAAGGGTAAAACATATCTGGAACCACGACAGGGAT  
GATGCAGGGGATATTGCATTATACTTCCTCATTATTACACACCATTTCATCAAGAATACATCCG  
GTCCTTGTCTTTAAAATATTCAACCTGAAGGTTGCTCCTGAGATGAGCAAAAAGCCTGGTTTGT  
GACATGATGCAAGGATCAGATGATAGTAGCATGCTAATCAGCTTCCCAGCTGATGACGAGAA  
GGTTCTCACCAGATGCAAAGTGGCCGCAGCCATATGCTTCCGAATGAAGAAGGAGCTGGGAG  
TGTACCTTGCCATCTACCCCTCAGAGAAGTCCACAGCAAACACAGATTTTGTGATGGAGTACA  
ATTCTGAATTTTATTTCCACACCCAGCATGTTAGACCGACGATCAGGTGGATTGCAGCATGTTG  
CAGCCTGCCAGAAGTGGAAACACTAGTAGCCCGCCAGGAAGAGGCCTCTAATCTAATGACTT  
CAGTTACTGAGGGGGGTGGGTCATTCTCCTTAGCTGCAATGATTCAGCAAGCTCAGTGCCTC  
TCCATTACATGCTAATGGGCATGGGAGTGTCTGAGCTATTCTTAGAGTATAAGAAGGCAGTGC  
TGAAGTGGAATGACCCTGGTCTGGGTTTCTTCCTGCTTGACAATCCTTATGCGTGCGGGTTGGG  
AGGTTTTAGATTTAATCTCTTCAAAGCCATCACCAGAACTGATTTGCAGAAGCTATATGCTTTC  
TTCATGAAGAAGGTTAAGGGCTCAGCTGCTAGGGACTGGGCAGATGAGGATGTTACCATCCC  
AGAAACGTGTAGCGTGAGCCCAGGTGGCGCTCTAATTCTTAGCTCCTCTCTAAAGTGGGGATC  
TAGGAAGAAGTTTCAGAACTGAGAGACCGTTTGAACATACCAGAGAACTGGATTGAGCTAA  
TAAATGAGAATCCAGAGGTGCTCTATCGAGCTCCCAGAACAGGCCCCAGAAATATTGTTGCGC  
ATTGCAGAGAAAGTCCATAGCCCTGGTGTGTGTGCATCATTGTCTTCTGGCAATGCAGTCTGTA  
AAGTCATGGCCTCAGCTGTATACTTCTTATCAGCAACAATTTTGAAGACACTGGACGCCCTG  
AGTTCAACTTCTTAGAGGATTCCAAGTACAGCTTGCTACAAAAGATGGCCGCATATTCTGGCT  
TTCATGGTTTCAATGATATGGAGCCAGAAGATATATTATTCCTATTCCCGAACATTGAGGAATT  
AGAATCACTGGATTCTATAGTTTACAACAAGGGAGAAATAGACATCATCCCAAGAGTTAATA  
TCAGGGATGCAACCCAAACCAGGGTCACTATCTTTAATGAGCAGAAGACCCTCCGAACATCT  
CCAGAGAAGTTGGTGTGAGACAAGTGGTTCGGGACTCAGAAGAGTAGGATAGGCCAAAACAA  
CTTTCCTGGCTGAATGGGAGAAGCTAAAGAAAATTGTGAAGTGGTTGGAAGACACTCCAGAA  
GCAACTCTAGCTCACACTCCACTGAATAACCATATTCAGGTTAGGAATTTCTTTGCTAGAATG  
GAAAGCAAGCCTAGAACGGTTAGAATAACAGGAGCTCCTGTAAAGAAGAGGTCAGGGGTTA  
GCAAGATAGCTATGGTTATCCGTGACAATTTCTCCCGGATGGGCCATCTTAGAGGTGTAGAAG  
ACCTCGCTGGCTTCACTCGTAGTGTGTGAGCTGAAATCCTCAAGCACTTTCTGTTCTGCATACT  
ACAGGGTCCATACAGTGAGAGCTATAAGCTACAGCTAATCTACAGAGTCCTAAGCTCAGTGT  
CAAACGTTGAGATAAAGGAATCGGATGGTAAGACAAAAACCAATTTGATTGGGATCCTTCAG  
AGATTTCTAGATGGTGATCACGTTGTCCCTATAATTGAAGAGATGGGAGCCGGAACAGTGGGT  
GGATTCATCAAGAGACAACAGTCTAAGGTTGTGCAAAAATAAAGTGGTCTATTATGGAGTTGG  
GATCTGGAGAGGCTTCATGGATGGATATCAGGTCCATCTTGAGATAGAAAATGACATAGGAC  
AGCCCCCAAGGCTTAGGAATGTCACAATACTGTGAGAGCAGCCCATGGGATCTGAGTGTG  
CCAATAAGGCAGTGGGCAGAAGACATGGGGGTACAAACAACCAGGATTATTCCTCTAAATC  
TAGCAGAGGAGCTAGATATTGGATGCATTATTTAGGATGCAAGGACCCAGCAAGCCATTG  
GATGCCCAGTTTATATTATTAAGGGTGACATGTCAGATGTTATCAGACTGAGAAAAGAGGAG  
GTGGAGATGAAAGTACGGGGCTCTACTCTCAACTTGTACACTAAGCACCATTCTCATCAAGAC  
TTACACATTTTATCTTACACTGCATCAGACAATGATCTCAGTCCAGGCATTTTCAAGTCAATAT  
CAGATGAGGGAGTAGCTCAAGCCCTGCAGTTATTTGAGAGGGAGCCAAGCAACTGCTGGGTG  
AGATGTGAGTCTGTAGCTCCAAAATTCATATCAGCCATCCTTGAGATATGTGAGGGGAAGAG

ACAGATAAAAGGAATCAACAGAACCAGACTCTCAGAGATTGTGAGAATTTGTTCTGAATCTT  
CCCTAAGATCAAAGGTCGGATCTATGTTCTCATTTGTCGCCAATGTTGAGGAGGCCCATGATG  
TTGATTATGATGCGTTAATGGATCTAATGATAGAAGATGCTAAGAACAAATGCATTCAGTCATG  
TTGTCGATTGCATAGAGTTGGATGTTAATGGTCCTTACGAGATGGAGTCTTTTGATACATCTGA  
TGTCAACCTCTTTGGGCCAGCCATTACAAGGACATCAGTTCATTATCTATGATTGCTCATCCC  
TTAATGGATAAGTTTGTGATTATGCCATTTCCAAGATGGGGAGAGCCTCAGTTAGAAAAGTT  
CTAGAGACAGGTTCGGTGCTCTAGCAAAGACTATGATTTATCAAAGGTTCTCTTCAGAACTCTA  
CAGAGACCAGAAGAGAGCATTAGGATAGATGATCTGGAGTTATATGAGGAGACAGATGTGG  
CGGATGACATGCTAGGCTAAGACCAATAAGCAAAGTCAGGCTTAGATTTAGGGATACTACGC  
TAGTATTGGAATCCATGTGGGTTCTGATACTAGCATAGTGCTACAATATTGGGCGGTCTTTGTG  
T

**>Rift valley fever virus segment M (animal origin)**

ACACAAAGACGGTGCATTAAATGTATGTTTTACTAACAATTCTGATCACGGTTCTGGTGTGTG  
AGGCGGTTATTAGAGTGTCTCTAAGTTCCACAAGAGAAGAGACCTGCTTTGGTGACTACACCA  
ACCCAGAGATGATTGAAGGAGCTTGGGATTCCTCAGAGAGGAGGAGATGCCAGAGGAGCT  
CTCCTGTTCCATATCAGGCATAAGGGAGGTCAAAACCTCAAGCCAGGAATTGTATAGGGCATT  
AAAAGCCATCATTGCTGCTGATGGCTTGAACAACATCACCTGCCATGGTAAGGATCCTGAGG  
ATAAGATTTCTCTCGTAAAGGGTCCTCCTCACAAAAAGCGGGTGGGGATAGTTCCGGTGTGAGA  
GACGAAGAGACGCTAAGCAAATAGGAAGAGAAACCATGGCAGGGATTGCAATGACAGTCTT  
TCCAGCCTTAGCAGTTTTTGTCTTGGCACCTGTTGTTTTTGTGTAAGACCCTCATCTCAGAAAC  
AGACCAGGGAAGGGGCACAACCTACATTGACGGGATGACTCAGGAGGACGCCACATGCAAAC  
CTGTGACATATGCTGGGGCTTGTAGCAGTTTTGATGTCTTGCTCGAAAAGGGAAAAATTCCCCCT  
CTTCCAGTCGTATGCCCATCACAGAACCTACTAGAAGCAGTTCACGACACCATCATTGCAAA  
GGCTGATCCACCTAGCTGTGACCTTCAGAGTGCTCATGGGAATCCCTGCATGAAGGAGAAACT  
CGTGATGAAGACACACTGTCCAAATGACTACCAGTCAGCTCATTACCTCAACAATGACGGGA  
AAATGGCTTCAGTCAAGTGCCCTCCTAAATATGAGCTCACTGAGGACTGCAATTTTTGCAGGC  
AGATGACAGGTGCTAGCTTGAAGAAGGGGTCTTATCCTCTTCAGGACTTATTTTGTGAGTCAA  
GTGAGGATGATGGATCAAAATTAACAAAAATGAAAGGGGTCTGCGAAGTGGGGGTTC  
AGCACTCAAAAAGTGTGATGGCCAACTCAGCACTGCACATGAGGTTGTGCCCTTTGCAGTATT  
TAAGAACTCAAAGAAGGTTTATCTTGATAAGCTTGACCTCAAGACTGAGGAAAATCTGTTGCC  
AGACTCATTGTCTGCTTCGAGCATAAGGGACAGTATAAAGGAACAATGGACTCTGGTCAGA  
CCAAGAGGGAGCTCAAAAGCTTTGATATCTCTCAGTGCCCCAAGATTGGAGGACATGGTAGC  
AAGAAGTGCAGTGGGGACGCAGCTTTTTGCTCTGCTTATGAGTGCAGTCTCAATACGCCAAT  
GCTTATTGTTACATGCTAATGGGTGAGGAGTTGTACAGATACAAGTATCCGGGGTCTGGAAG  
AAGCCTTTGTGTGTCGGGTATGAGAGGGTGGTTGTGAAGAGAGAACTCTCTGCTAAGCCCATC  
CAGAGAGTTGAGCCTTGCACAACTTGTATAACCAAATGTGAGCCTCACGGATTGGTTGTCCGA  
TCAACAGGTTTCAAGATATCATCTGCAGTTGCTTGTGCTAGCGGAGTTTGCGTTACAGGATCGC  
AGAGCCCTTCTACCGAGATTACACTCAAGTATCCAGGGATATCCCAGTCCTCTGGGGGGGAC  
ATAGGGGTTACATGGCACATGATGATCAGTCAGTTAGCTCCAAAATAGTAGCTCACTGCCCT  
CCCCAGGATCCATGCCTAGTGCATGGCTGCATAGTGTGTGCTCATGGCCTGATAAATTACCAG  
TGTCACACTGCTCTCAGTGCCTTTGTTGTTGTGTTTCGTATTTAGCTCTGTGCAATAATTTGTTT  
GCCATTCTTTATAAAGTTCTCAAGTGCCTAAAGATTGCCCCAAGGAAAGTTCTGGATCCACTA  
ATGTGGATTACTGTTTTTCATCAGATGGGTGTATAAGAAGATGGTTGCCAGAGTAGCAGACAAT  
ATCAATCAGGTGAACAGGGAAATAGGATGGATGGAAGGAGGCCAGCTGGCTCTAGGGAACC

CTGCCCCCTATTCCTCGTCATGCTCCAATTCCACGTTATAGCACATACCTAATGCTACTATTGAT  
TGTCTCATATGCATCAGCATGTTTCAGAACTGATTCAGGCAAGCTCCAGAATCACCACCTTGCTC  
CACAGAAGGTGTCAACACCAAGTGTAGGCTGTCTGGCACAGCATTAAATCAGGGCAGGGTCAG  
TTGGGGCAGAGGCTTGTGTTGATGTTAAAGGGGGTCAAGGAAGACCAAACCAAGTTTTTTGAAG  
ATAAAAACTGTCTCAAGTGAGCTATCGTGCAGGGAGGGCCAGAGCTATTGGACTGGGTCCTTT  
AGCCCTAAATGTCTGAGCTCAAGGAGATGCCATCTTGTCTGGGGAATGTCATGTGAATAGGTGT  
CTGTCTTGGAGAGACAATGAAACCTCAGCAGAATTTTCATTTGTTGGGGAAAGCACGACCATG  
CGGGAGAACAAGTGTGTTTGTAGCAGTGTGGAGGATGGGGATGTGGGTGTTTCAATGTGAACCC  
ATCTTGCTTATTTGTGCACACGTATCTGCAGTCAGTCAGAAAAGAGGGCCCTTAGAGTTTTCAAC  
TGTATCGATTGGGTGCATAAACTCACTCTAGAGATTACTGACTTTGATGGCTCTGTTTCAACAA  
TAGACCTGGGAGCATCATCTAGCCGTTTCACAACTGGGGTTCAGTTAGCCTCTCACTGGACG  
CAGAGGGCATTTCAGGCTCAAACAGCTTTTCCTTCATTGAGAGCCCAGGCAAAGGGTATGCA  
ATTGTTGATGAGCCATTCTCAGAAATTCCTCGGCAAGGGTCTTGGGGGAGATCAGGTGCAAT  
TCAGAATCTTCAGTCCTGAGTGCTCATGAATCATGCCTTAGGGCACCAAATCTTATTTCATACA  
AGCCCATGATAGATCAGTTGGAGTGCACAACAAATCTGATTGATCCCTTTGTTGCTTTGAGA  
GGGGCTCTCTGCCACAGACAAGGAATGACAAAACCTTTGCAGCTTCAAAAGGAAATAGGGGT  
GTTCAAGCTTTCTCTAAGGGCTCTGTACAGGCTGATCTAACACTGATGTTTGACAATTTTGAGG  
TGGACTTTGTGGGAGCAGCCGTGTCTTGTGATGCCGCCTTCTTAAATTTGACAGGTTGCTATTC  
CTGCAATGCAGGGGGCCAGAGTCTGCCTGTCTATCACATCCACAGGAACTGGAACCTCTCTCTGC  
CCACAATAAAGATGGATCTCTGCATATAGTTCTTCCATCAGAGAATGGAACAAAAGATCAGT  
GTCAGATACTACACTTCACTGTACCTGAGGTAGAGGAGGAGTTTATGTACTCTTGTGATGGAG  
ATGAGCGGCCTCTGTTGGTGAAGGGAACCCTGATAGCTATTGATCCATTTGATGATAGGCGAG  
AAGCAGGGGGGNAATCAACAGTTGTGAATCCAAAATCTGGATCTTGAATTTCTTTGACTGGT  
TTTCTGGACTCATGAGTTGGTTTGGAGGGCCCTTAAAGACTATACTCCTCATTTGCCTGTATGTA  
GCATTATCAATTGGGCTCTTTTCTTCTTATATATCTTGAAGAACAGGCCTCTCTAAAATGT  
GGCTTGCTGCCACCAAGAAAGCCTCATAGATCAGTACGTGTAGAAGCAATATATAGAAATAA  
GTAAACATAAGCAAATCTAATTATGTAAATATTGTACAGATGGGTCAAACCTATTGGGATATCC  
AAGTTTAGAATCTTGTACAATAGTACTTTAGATGTAAGCTTAGTTGTAATTTGGGGTGGTGGGG  
TGAGGCAGCAGTAGTCTCAAGTACATGTGGATATTCTAGTTAATGTGAATGTCTTTTGCCAGAT  
TAGCTGGAATTAACTAACTCTTTGAAGTTGCACCGGTCTTTGTGT

**>Rift valley fever virus segment S (animal origin)**

TCCGTACAGTTATACGTATTACTAAAGGTTAACTGGTAACTGGGACACAAGACTCCAGCACA  
GGACCACCTGAGCCACCTCCAACCACCACCAGCAAAACCAGCAAAAACCTTTTCAGAAACAT  
ATTGATCCTAATAAGCTAGGCCATATGACTCACATTCAAGTGTGTTTCGGCTCCTGCAGGGGAG  
CAAGAGAGGATATTTCTAATGCTGTAGTTCCAACTCAGCTCTCATTGATCTTATGGAGGGAG  
AAGAAACGATGCTGCGCTCATCCACTCCCCTAGCATGATGGGGAGAAACAACTGGAGTTCCA  
GTTGTTCCCTCCAATCCCAGATGTTGAGATAGAATCAGAGGAAGAGGTGATGACGATGGATATT  
GTTGAGGTAACTGGTAACTGGGACATAAGACTCCAGCACCACCACCCCAACCCCAATCCC  
GACCGTAACCCCAACCACCCCTTTTCCCCAAACCCCTGGGCAGCCACTTAGGCTGCTGTCTTG  
TACGCCTGAGCAGCTGCCATGACAGCTGCTGACGGCTTCCCATTGGAATCCACAAGCCCCAA  
AGCTTTCAAGAATTCTCTCCTCTTCTCATGGCTTATAAAGTTGCTATTCACTGCTGCATTCATTG  
GCTGCGTGAACGTTGCGGCAACCTCCTCCTTTGTTCTACCTCGGAGGTTTGGGTGATGACCCG  
GGAGAACTGCAGCAGATACAGAGAGTGAGCATCCAATATTGCCCTTAGATAGTCTTCTGGTA  
GAGAAGGGTCCACCATGCCAGCAAAGCTGGGGTGCATCATATGCCTTGGGTATGCAGGGGAT

AGGCCATCCATGGTGGTCCCAGTGACAGGAAGCCACTCACTCAAGACGACCAAAGCCTGGCA  
AGTCCAGCCAGCCAGGGCAGCAGCAACTCGTGATAGAGTCAACTCATCCCGGGAAGGATTCC  
CCTCCTTTAGCTTATACTTGTTGATGAGAGCCTCCACAGTTGCTTTGCCTTCTTTCGACATTTTC  
ATCATCATCCTCCGGGGCTTGTTGCCACGAGTCAGAGCCAGAACAATCATTTTCTTGGCATCCT  
TCTCCAGTCAGCCCCACCATACTGCTTTGAGAGTTCGATAACCCTACGGGCATCAAATCCTT  
GATAAGCAAACCTCTCGGACCCACTGTTCAATCTCATTGCGGTCCACTGCTTGAGCAGCAAACCT  
GGATCGCAAGCTCTTGATTAGTTGTCCATTATTGTAATGTAGTGTGTTGTATCTCTAAAAGGGAG  
CNNNGTGG

**> Dugbe virus segment S (animal origin)**

TCCCACAGTAACACCACNNGCCGGAGCTCTGCAGATCTCGCCCGGTGTGCTTACTTTGAAAG  
AAGCAAGATGGAGAATCAGATCAAGGCAAACAATNAAAAAGAGTTTGATGAGTGGTTTAAA  
CCTTTTAGTGAAAAGCTCCAATTAAGGTCAAACCTCACAACTCTGCATCCCTGTGTGATAGA  
GTACCTGACCTAGCTCTAGCAGAAATGAAAATGGCCCTTGCCACAGATGATAAAGAAAAAGA  
CTCAATCTTTTCTAATGCTCTGGTGGAGGCAACACGTTTCTGTGCTCCAATTTATGAGTGTGCTT  
GGACCTGCAGTACAGGCGTAGTGAGAAGAGCTTAAGCTGGTTTGATAAGAACAAGACTTC  
ATCAAGCTCTGGGACGCAAAGTACATGGATCTCAGAAAGGTATCCCTGAACCAGAGCAACT  
AGTTTCATACCAGCAGGCGGCCCAAAAGTGGAGAAAGGACGTTGGTTATGAAATTAACCAAT  
TCACAAGGTCTCTCACACATCCAGTTGTTGCAGAGTACAAAGTGCCTGGAGAAATTGCTGTTG  
ATGTCAAAGAAATGCTGTCTGACATGATCAGGCGCAGGAATGTCTGCTGAACGGAGACGGA  
GAAAATGCTGGGAAAAAAGGTCCTATCAGCAGAGAGCATGTCTCTTGGGGCCGTGAGTTGGC  
AGGAGGAAAGTTCCAAGTTGTGTTTAATCCTCCTTGGGGGGATATAAACAAGTGTGGTAAATC  
AGGCATTCTCTAGCAGCTACTGCCATGGTGAAGGTTGCTGAGCTAGATGGGTCAAAGAAGC  
TTGAAGATATAAGGCAGGCCCTTCTAGATCTAAAGAAATGGGTTGAAGATAACAAGGATGCA  
CTAGAGGATGGGAAAGGCAATGAGCTCGTCCAGACTATGACAAAGCATCTGGCTCAAGCAGT  
GGAATATCCAAAAAGTCCAATGCCCTGCGTGCACAAGGAGCACAAATAGACACTCCTTTCT  
CAGCCTTTTATTGGGCTTGGAGCGCTGGGGTTAAGCCAGAGACATTTTCACTTTGTCTCAATT  
CCTCTTTGAGATGGGCCAGAATGCTAGAGGAGGCAAAAAAATGATCAAAGCACTGACTTCCA  
CACCATAAGGTGGGGCAAGGGATTGATTAACCTGTTTGCAGATGATGACTTTTTGGGCAACA  
GACTATACATGCATCCTGCAGTTCTGACTCCTGGTGAATGAGTGAAATGGGTGCATGCTTTG  
GGGTTATTCCTGTTGCAAGCCCAGAAGATGCAATCCTAGGTTCAAGGACACTCAAAAAACATA  
CTGAACCTTCAAATGACACCAGTGTGCAGAACCCATGTGCATCCACAATCGTGCAACTATAC  
AGAATCCAGAAATCTGGCTTTGATCTGGAAAGCTTAGAAGTAGTGTCTACTGAACATCTTTTG  
CACCAGTCATTTGTTGGTAAAAGATGCCCCAACCCAGAATGCTTACAAGGTGAGAGGAAATGC  
AACCAATGTTAACATCATCTAAAAGCTGGCATTGTGTGGCCTTCCCTAACATCTTAAACAAGT  
TGCACATCAGCGAAAGGCCACTAAAAGCTTTTTTCTTGCTTATCTTTCCATTTTCTTCTTTAT  
ATATTAGTTTTGCTTTTTTGAATAACATACTAACATAGTATAAGTTGTAATCAATCTGCTAATTC  
TGCTTAACACAGGGGGGCTGTGCGGCAACGATATCTGCAGA

**> Dugbe virus segment M (animal origin)**

TCTCNaAGAcATacCTGCGGCACATACAAGTGTTAAAGGTGTTTACAATGTCTAAGAGGGTACT  
GATCATAGCCGTAGTGGTTTGTCTGGTATTCACTCAAAACCAGATAGCCGGCAACCACAC  
AACAGCCAACAGCGGCAGCCCGTCCACAAAAGAGGCAAGCAGCATGCCAACAGTCAGCGAC  
ACTCCACAAACAACCACCACCTCCACTGCAGTGTCCACCACCATCACCGCAACCACCCTCC

AACAGCTTCATGGACCACACAGAGTCAATATTTTAATAAAAACAACACAACACCATTGGAGAG  
AAGAAACCATGGTCTCAAGGAATCCTACTGTGCTGAACAGACAGAGAAGAGCAAGTTCTGTG  
AAAGAACTACTCAACACCAAGTTCTTAATGTTGTTAGGTTTCATTCCAAAGGGTGAAGTCAAT  
CACCTAGAAAATGCCTGCAACAGGGAAGGGAAAAACTGTACAGAATTGATACTGAAAGAAA  
GGATAGCTCGGTTCTTTTCTGAGACAGAAAAAGAGTCATGTTATAACACTTACCTAGAAAAAC  
ACCTTTGCAGTGTTAGCCCTGAAGTTAGTCTCACCcCTtACAGGGTCCTCGaGCTAaGAGAAGA  
CATTTTGCTAAAGAAAATCGACCGTAGAATCATCAGATtTgcaGCAGaCTccCaaAGaGTGACCTG  
TcTcTcAGcATctcTACTAAAACcTGAtGTCTtTATTAgGgAACAGAGAATTGATGCTAAGCCcTCCA  
ACGGTCCTaAAaTAGtGCCTGTGGACaGCGTGCGCTGcATAAACTTAgAAgCTAACGtAGATGTGa  
GATCAAACAAATTAGTGATACAGtCtTTGATGACcACAGTTAAAATTAGCCTGAAAAaCTGTAA  
GGTCGTAGTCAATTCTAGACAGTGCATCCaTCAGcaaACagGTTCTGGTGTTAtcAAAGTCCCAAA  
aTTCGAaCgCAGCAgggTGGGACTTGgtCaAGcAcATCGCCGGGGTGTACACAGCAACCATTGA  
CCTGTTAGATGAAAAAAaCCAAAACCTGCAAGCTATTTACAGAATGTATTGTCAAAGGTAGAG  
AGTTGGTTAAAGGACAAAGTGAACCTTAAGTCCTTCAATATAGAAGTCCTCCTACCGAGAGTG  
ATGAAGACTAGAAGAAAGCTGTTAGCTGTCACTGATGGTAGCACTGAATGTAATTCAGGGAC  
ACAGCTAATTGAAGGAAAGTCCATAGAGGTCCACAAACAAGACATAGGAGGGCCAGGGAAA  
AAGCTGACCATTTGTAAACGGCACTAGTGTCTCGATGTACCCCTGGATGAAGGACATGGATGC  
TACACCATTAATGTAATCACGTCCAAAAGGGCATGCAGACCAAAGAACAGCAAGTTACAGTG  
TTCAATTGACAAAGAGCTTAAGCCTTGtGACTCAGGCAAGTGTGTTGAGTATCAGCCAAAAaGG  
AGCAGGCCACATTAAGGTGAGCAGAGGGAAAACCATTCTTATTACCGAATGCAAAGAACA  
GCTGCCAGATCCCAGTACCAACTGGAAAAGGGGATATAATGGTGGACTGCTCAGGAGGCCGTCAG  
CACTATTTGGAGGTGAACATCGTTGATATCCACTGCCCTAACACAAAATTCTTAGGAGGAATA  
ATGCTTTATTTCTGTAGAATGTCAAGCAGACCTACAGTAGCAtTGCTtCTtGGCATCTGGATTgG  
CTGCGGTATATACTCACATGCATCTTCTCATTTTTGCTATACCACTTAATTTTATTCTTTGCAA  
ACTGTATAAAACAGTGCAGAAAGAAAGGAGAGCGGCTTGAGAAATCTGTGTCAAGTGCGA  
GCAGCAAACAGTTAACCTTATGGACCAAGAGCTGCATGACCTCAATTGCAATTTCAATCTTTG  
TCCTTATTGCTGCAATCGAATGTCAGACGAAGGTATGAGCAGGCATGTAGGTAAGTGTCTTAA  
AAGATTAGAAAGACTTAATGAAATAGAGCTCTATCTAAACTACAAGCGAGTGCCTTCTTGCCT  
AAGGTGTATGCTATCAACTTCTATAAGCGTAGGCATTTTCTTGAAAAGAACAACCTGGCTGGT  
TGTAATTCTGGTTCTGTTAGGATTAGCCATTTACCAGTTCAAGGAGCTCCaGCAGAGGTCAGT  
AATGTTAAACAGGACGGTGACTACAGTATCTGCTACTTTATTTTTGGTTGTTTGGTGACAGCTG  
CACTTTTGTGGAAGGTCAAGAGAACAAACTCTAATGGCATTGTGGTAGTGGTCGATAGCTTTG  
GAAGATGTCCATACTGTAATGAATTCAGTTCATTATTTGAGGAAGTGCTTCACGATACAC  
TATGCAGTCTCTGTGTCTGTCTTTCTGTGAGAAACAGGCTCTTGATCTGGTGACCCTTGAAGA  
ACATGTCAAAGAATGCTACAAAGTTACAACCTAGGAAGGACATATTCAAGATATTAGGGAGAA  
AGTTCACCAATGCTCTAGTTAGAAGGGAAAAACTGTTTCAACAGGACTGCAGCTCTTCATA  
AATAAAACAAATGTTGTCGTCTTTGCTCTCATTATGTGCTTCTTGCTACTGTAAACAGGACATA  
ACGCAAGTGCTTTTGATTCTGGTGACTTGCCAGATGGGATATGGGAAGAATCAAGCCAACTTG  
TTAAGTCATGTACACAGTTTGTGTTACATAGAAGAAGATATCTGCTAgaGCTCCTGCTGaGaaTGgC  
GTgGGAATGAAtTcCTgTTCTTcAAtgCCTTcAGcAATTcAcTGAAAAGACTTTCAGATTCTCACAA  
GTTGTTGACAAAGTGTCTCAATTGATGCACCTTGGGGTGCAATTAATGTTGAATCAACCTGGAA  
ACCAACACTGGCAGCATCCAACATTGCCATGAGCTGGAGCTCCACTGACATCAAAGGTGAGA  
AGGTTATACTATCAGGAAGGAGCACATCCATAATAAAGCTTAAAGAAAAAACTGGTGTGATG  
TGGGAGCTTGGGTCAGAACTAGCATCAGAAAAAAaGAAACTTTTAGTTTCGATAATGGATTTT  
GCCCAAGTCTACAATTCAAGTATTCCAGTACATAACAGGTGATAGACTACTAAGTGAATGGCC  
AAAAGCCGTCTGCACAGGAGATTGTCCTCATAGATGTGGCTGCCAAACATCAACTTGTATGGC

CAAAGAGTGGCCACACACAAGAACTGGCGGTGCAACCCACATGGTGTGGGGAATTGGTA  
CTGGTTGCACCTGCTGTGGTATGGATGTGGAAAGGCCATTTAATAAATATCTTGGTGTAAAGTG  
GTCAACAGAATATCTTAGAACTGAGGTGTTGGTCTGCGTGGAGGTCACGGAGGAGGAGAGGC  
ACTGTGAAATTGTGCGAGGCAGGAACCAGATTCAACATTGGCCCTATAACAATAACGATTTC  
GATCCCCAAAACATTGGAAGTAAGCTTCCAGAAAAGTTTAATGACAGTCCAAGAAATTGATGA  
CAGCAACTTTGTGACATAATGCATGTTGGTAATGTTATCTCTGCTGACAACAGTTGTAGGCTT  
CAAAGCTGCACTCATGGCAGTGCCGGTGACTACCAGATTTACAGCACTGACAGCTTAATCAA  
AGATGATCACAGTTCTGGACTCAACCTAGCTGTGTTAGATCCCAAAGTCAACAGTAGCTGGCT  
ATCATGGGAAGGGTGTGACATGGACTACTACTGTAATGTTGGCGATTGGCCAACCTGTACCTA  
CACTGGTGTAGTGACTCAAACTCAGAGAGTTTCTCAAACCTGATCAACATAGAAAAAGATT  
ACACACAACGCTTTCATTTTCACTCaAAAAGAATCTCAGCAAAAGGTCACACACTTCAGTTAG  
ACTTAAAGGCAAGACCTAACCAGGATGGAGGTGAAGTGACAGCACTGATTGAAGTTGATGGT  
ATGGAGTTACATTCAAAGACAATAAGGCTAAGTGGTATAAGACTAACTGGACTGAAATGCAG  
TGGTTGTTTTAGTTGCACTTCTGGCATATCATGCAGCGTCAATGCCAAGTTGACTTCTCCAGAC  
GAATTTACACTGCATCTGAGGAGCACCAGTCCCAATGTGGTAGTGGCAGAACTAGCATAAT  
TGCAAGAAAGGGTCCAAGTGCCACAACCTAGCAAGTTTAAAGTGTCTCTGTTTCGTGATACAAA  
GAAAATTTGCTTTGAGGTGGTGGAAAGAGAATACTGCAAAGATTGTTCTCCTGATGAACTCAC  
TACATGCACTGGTGTGAGTTAGAACCTCCCAAAGACATATTGTTAGAACATAGAGGAACAA  
TAGTACAGCACCAAAACGACACTTGCAAATCTAAGATTGACTGTTGGTCAAATTCTATAAGTT  
CATTCGCATCTGGTATAGGAGATTTTTTTAAGCATTACATTGGAAGCATTGCTGTCCGAATACT  
TGGCACGGTCTTTCCTTTCGCCCTTTTAATTCTTTTTTTCATATACGGTGACAAAATGCTTTGGC  
CTTTCAAAGTTTTTTGTAGGCCATGTAGAAGGTGCTGTAGAAAAAATGAAGGATACAACAAA  
CTGGCTGAAGAAGAAGAGCTGAGAGACATAATAAGAAAGTTCAGTAAAAGTGGTGAACCTTA  
TCAACAAAGATGCAAAAGATAAGAGAACTCTTGCAAGACTATTCATGTCTGACAACCCAAAA  
TTAAAAAAGAAAAAAACTTTCTGAAATTGCTTAACAGGTACTAAAAGTGGTGTACTCAC  
CACAACCACCCAAATCAAGAAGACCTAGTGAATTTTATGTAGTTCTAAGTTGCTCACAGTTTA  
AGGTTCTTTAACTTACTTACTCTATTAATCCACTATGCCTGCTTTTGCTAACTCTAATTTTAAA  
ACTTGCTGTGCCGCCACGATATCTGCAGA

**> Dugbe virus segment L (animal origin)**

TCTCAAAGATATCAATCCACCTTTTCCCCAAAACCTNAACATGGACTTCTTAGACAGTCTAATT  
TGGGAAAGGGTGTGATGAACAATATCACTAACCCAACATTTTGTGTTAGTGACTATTTTG  
AAGTTATCAGACAGCCAGGGGATGGCAACTGTTTTTACCATAGCATTGCAGAAGTGTCTTTG  
ATGTCAAAACACCATCTAGCTTTAGAAAAGTAAAGGAGCATTTACAGTTAGCAGCAGAAGTG  
TACTATGACACTGAGCCAGAGGCAGTAGGAAGTGAATCTCAAAAGATGAGTACATCAAGGT  
CGCAATGAAAGACAATGAATGGGGAGGTTCTTGAAGCTTCAATGTTATCAAAGCATCTCC  
AAACAACCATCATCTTGTGGGTGGTCAATTCAACAGAACAGGTTACGGCCGCCATTAAGTTTG  
GACCAGGTAGGGTGTCAACAGCTCTAAATCTTATGCATGTTGGTCGCACACACTTCGATGCGC  
TTAGGATAATAGAACAGCTGGAGAACAAACCTCAAGACAGGAATAGGCTAGACATAGC  
AGACAGAATTGCAGCTGCGGAGGTTTATGTGAGCCAGTCTATAGAGGACAATTTGCAAGAGG  
ACGAATTCTTTGACTACGCAAGAGAGGATGAGATTTTCAAGAGATGTCAGTGCACCAGGAGGC  
TCCAGAGAAGCAACTGAACTAAAAAAGAAGGCAATACTTTTGAACAAAAGTGTAAAGAG  
GAGAAAACATACCAATAAGGGTAGGCAGAGTCCTTGACTGTCTATTTCAGCTGCAAGATTGCA  
GTTAGTTTATAGATGAAGGGTACTCTATTTGAGACCTGAAACCAGGGAAAGTGAAGCCACCTC  
AATTTCTCTAAGACAACCTTGGACACAAGCTACTACCCGTGATAGGCACATTAAAATGGAAT



ATGCTAGATCCAAACTCTATGTGACCAGGGATCTCATAGATCACCTGGATATAGGTGGCTTGC  
TTAGATCATCATTTCTGGCTTAGGATTAGAGAGGTACATACAGCTGTTGCACTCAGAGCTTGT  
GTTAGACTTGGTAAACAGTAGTGCTTGCTGTACTATTATCAACTTTCTTGTATGGCTCAAACAAC  
AAGAATAAAAAACAGTTTATAACAACTGTTTATTAAATACTAAGCTTTCAGGCAAAAGAGT  
GTTTAAAGCATTATCAAAATTAACCTGGTCAAATGTTGTATCGTACTCCAAAAAGGGCAGTATC  
AATTGTGTCTCAAGAGCTCTATGGGAACTAATGCTAAAGGTGAAGAACAACCTTAGAGGGAA  
TGGGACCAATAAGCATGCTAGCATTAAAGGAATCTAGACTTTGACAATATGCAGCTTCAAGACT  
ATCTGGAAATGTTATCTGAAATGTCCAAGATTGACAATTCTGATGTTGAATATACTCACAGAG  
AAATAAGTGACCTTCATACATTAGTTGAAAGGCTAAGTAACTTCAGAAGTCTCAAGATGTTA  
ACGAATCAAGCTATGGTTTAAGGAAGAGGTGTTGACAAAAAGGTCACAAAGGAGTGTGGC  
AATGCCTTTGAGTTTTTAATCAATGATTACTTTAAGAAGAAGGACATTATGAAGTTTGTCTTA  
CATCAGGGAAAGCATCAAGTACTGGAAACATTGGAAATGTGCTATCATATGCACACAACCTG  
TACCTCAGTAAGGAAAGTCTTAGAATGACCTCTGAAGATGTTACTCAATTACTAATAGAAATC  
AGAAAGTTGCATAAACTACAAGGTGATCTTAGTATTGAGCCAGTAGCCATAATTTGCGACAA  
GCTAGAGGACCAATTCAGAAAGCTATTGAGGGAGCTGCCTGAAGAATGCAGCAGCGAATGCC  
AGACACTATTTAATGACATACGCAACTCTCCAAGCCACAGTGTTGCGTGGAAACATGCTCTTA  
GACTGAAAGGAACAGCATATGAGGGGATGTTTGCAAAACAATATGGTTGGTCGTACATCTCA  
GAAGATATTAACCTAGTTTAACAATGATTGTTCAAACCTCTTTTCCCAGAGTCCTTTGAGGCAT  
TTTTGGATAGGACTCAGCTACATCCAGAGTTTCGGGATCTCACCCCTGATTATGCTCTAACTCA  
GAAAATATTCTTTCCCAGAAACACAATACCTAGAACAGAAAACAGACAGCTTGCAATAGATG  
TCTCACTGGAAGGCTCTGTTGAGGCTGTACCCGTTGTGGAAAAAAGAATGTTTCCTCTTCTGA  
GGTTCCAATTGGAGAGGCTAACTCAATCAGTAGAGTTATGAATATATTCAAGGAGAAAAGGA  
AAGAGAGCATGCAAAAGAACTTGAGCATGATAGACAGGCAGAAGCGAATCGACTAAAAA  
GTGCTGGATTAGGTGCCTCCAAGGCAGAGCAGGAAGTTTGCAACAGCGCTCAAGACAGAAA  
AGAGGAAAAAGAGAGAACCATAGAGCCTGCTGGAAAACAGCAGAGAACAGAAGACCTTGT  
TGTCATTGAGGGCAGCCAAGATGAAGGTAATAGTGATCCACAGAAGAAAGTCGATGAAAAG  
ACAGTTCCGGGGGAGTCAAAACAACACTCCAAAAGCAGTAAATCAAGTAGCACGAACCAAA  
TGAGCCAAAAGGTTGTAGATGTTCCCTCAGTAGAAGATAGCTCCGATCAAGCACCTGGTGATT  
TTCCAGATTATGGATACTACTTTAAAAGAATTGTATGATGAGAAATGGCACAGTGCTGACTG  
AAGAGGCACAACCTAGAAAAGAGACAGTTACTCTTTATTGAAGTAGGCTACCAGACAGATGTT  
GACGGCAAAATTACTACAGATTACAAGAAGTGGAAGGACATTCTGAGGTTGCTAGAGCTTCT  
AAACATTAAATGCTCCTTTATTGCATGTGCAGACTGTTCTTCAACACCATCGAACAACTGGTG  
GATTAGTGAAGATAAAGTCAGGCTTTTAAAAAATTCAATTAGTCATCTGTTTTCAAACTGAC  
CCAGAATTCTCCTGCAGATATCACAGACATAGTAGTTGGTTCCATAAGCACACAAAAAGTTA  
GAAGCTATTTAAAGTCTGGTACAGCAACCAAGACACCCATTTCACTGAAGGATGTGCAGGAA  
ACATGGTCTAAAATGAAAGACTACATAGTAAACAGGCCAACTGGAATTTCACTGAACAAAGA  
GCTGGTTGGTGCCCTTTATCAAGGTCTTGTGGAAGGAGCAATAATTAGTAAAGAAGGCACAG  
CCAACCTTAATACAGATGTTAAAAGACAAGCAGGAAAGAATCACAGATGAGTTTGAAAGAAC  
AAAGTTAAAACATGAAGTCAATGAAGATGTCAAGACAAGTGAGAAATTACTGTTAGGTTGGT  
TAATGGAAGACCTCAAAGGCTGCCGTTGCATGGGATGTTTAACTAAAATAAAAGAACTCTCT  
GAATCAATGTCAGTAAACCAGGATAGGCTGGAATACTTGTCAACCAACTGCCAAACAAAGAG  
TCACTGCACTGAATGCCACCCAAGAAGCTTAGAGTATAGAAATATTTCAAATGTGGACAATA  
GGGTTCCCAGCATGCAGAGAGTCAGTCATTCAAGAAATGAAGGTTTTGAAGACACAAATGAG  
ACACTCACTGAACTAGATAGGCTTGTAAGATTAACACTGCCAGGTAAGACAGAGAAAGAGA  
GAAGAGTGAAACGTAATGTTGAAGGTCTAATCAGGTTTCATGATGCAGCAGTCAAGCTTAGAC  
TGTATAAAGCTACCATCTGGACAAATAATTGCTCACAGATGCAATAAAAAATTTAAAAACAG

TTCAGAAGCTGAAGAGAAGTGCAACGAAAGATTTGAGAGGTTAATGAAAGAATTATCAGAG  
CAGAAGCTTAAGCCCTACTCAGATCATGTAAAGAAGACAATCACAAGTTCCTTAAAAAAAAC  
AGACAAGCAAGCAGGTTCTAAGTGTGCTGTACCAAGGTTGTGGCTAGAAACACTAATCAGAG  
ACTTGAGGGTTCCTACAAAGGATGAGGAGATTCTTCTCAACATACGCACAAGTATGCAAAGT  
AAGACCAACTTCATCAGAAATAATGATAAACTCATTATCAGAAGTAATAAGGAAATTGCTGA  
TTACTTAGAACTAAAAGGAAAAATTTGTTGTCAGAAAAGGCCTCTGATAAAATCTTTTCATC  
TGATTGTATACTTTTCAAAGAGGTTATTGCGGAAGCTCTCAGGAGGTACTACAGTACTCCCTAT  
GAAGGTGTGCCAGAAACAATAGTAAAACTCATCAACTTTTTGTGCACATTTGGTTGGTTTCAG  
GAGGTAGTCTTATACAGCAAGATCTGTGAACTTTTTTGAGATGTTGTACAGAGTTTAGTAGAT  
CAGGAATTAAACTGGTAAAGGTGAGACACTGCGACACCAACTTATCAATAAACTGCCATCA  
AATAAAAAAGAAAACATGCTCTGCTGCCTTTATGATAAGAACATGTCCCTCTTAAAAGGCCCT  
TTTTTCTAAACAGAAGACAAGCAATTCTCGGCAGTGCCTATCCTTACATACTAATAACTTTGT  
ACATTCAAGTTCTGCAGCAACACAGATGTCTAGAAGTGTTAAACAGTGTTAATGACAGAGTTG  
TTGGCAATATTAACACCTGCACCAGCAATCTTCTGAACACAGTTAAAGCAGAACTAACACTG  
GTAAACTCTGGACTTTTTGAAAAAGCATATGAGTGTAGAACAGAGCAGTGTAGGTTAGGAGG  
CAACTTTTTGAACAGAAGTAGTAGAGACCATTTCATTTCAACTGTATCAGGCCTTAATGTTGTC  
TACGGTGCATTGATTAAAGACAATCTGCTAGCTAATTCTCAGCCGCAGAACAAGCAATTACA  
GATGCTCAGATTTGGCATGTTATGCGGGCTAAGCAGATTGTCCAGCGCTCTAGAGCTAGGTAA  
GAAGTTCTCTACAAGCTGCAGAAGGATTGAGGATAACATTATGAGACTGTATTTGCAGTCAAC  
AATCTACTCTGCAAACAGAGATGTAAGTCAGAATGTGCAAACTGGAAGGTGAAAGATTTAT  
GCCCAGATATCACTATCCCTTGTTTCTCAGTTTATGGTCTCTTTGTTAACAGTGACCGGCAGCTT  
ATATTCGACATTTACAATGTACATATTTACAACAAAGAGATGGACAACCTTTGACGAGGGGTGC  
ATTACAGTCTTAGAGGAGACAGCTGAAAGGCATATGCTTTGGGAACCTTGACCTTCTAAGATCT  
TTGGAGGGAGACACTAGGGATGTTTCGAGCAGCAAGGCTCCTGCTAGGTTGTCCCAATATAAG  
GAAGGCAACTGACAAAGATGGAAACAGGCTAATGAAAAAGGGAATTACAGATGACTTGAGG  
GAAGAAGCTGGTAGTGACTCCTCTAGTATTAGTGGCAGAAGGTCATATGCCTCGAGTGGAAC  
CAGAGTGAAAAGCATGTTTCGGCAAATACAATTCTTCTCAAAAACCATTTGAGCTTAAGCCTGG  
CCTAGAAGTGGTAAATGACCCTCTTCATGATTATAAGCAGGCTGTACAAGATAGCTTCTGTTA  
CTCAGAATACACCCCTAACACAGAAAGTGTGTTAAAGGACTGCATTCATATAATAAGAACAA  
ATCCAAGTCACACAATGGGTTTCATATGAGTTAATTCAAGCAGTGACGGAAAATGCGAGACGA  
AAATATCCTCCAGAAAATATAGAAAGAGCAAGAAAGGATCCAAAAAACTGGGTCAGCATAT  
CTGAGGTCACTGAAACAACAAGCATCGTCTCACAACCTAGAACACATTTTATGCTCAAAGAC  
TGCTATAAAGTTCTACTAGGAACAGAGAACAAAAAAATTTGTGAAGATGTTGAGAGGTAAGCT  
CAAGAACTAGGTGCAATGAGGACAGATATTGAGATAGGAAAGAAGGATTGTCTAGATCTGT  
TGACAACTGTTGATGGTCTGTCTGAGGAACAGTGTAAGAATATAGTAAATGGTATATTTGAGC  
CTTCTAAACTATCTTTCTATCACTGGAAGGATCTTCTAAAGAAAGAATTAAGTGAGGTTTTACT  
AACTGATGATGGTAACTACATTTATTGCTGGCTCAAAACATTATCTTCAATGGTCAAACACTC  
GTTGAAAAAAGACTTGCGGTTTCATGACAGGTAAAAATTCCTTGATATAAAGCCAGAAATGT  
TCACAGACGAAGAATATTCAGCTCTGAACATTATGAAGTTAGAATTGTTGGGCGAACAAGCC  
GATGGAATACAGGGCAAACTGACTTCCTCTTGAGTTCTTGGA AAAAATGTGCCCTAAAGCC  
CAAAGAAGGCCAGTCAATATTAATGTAGGGCTAAATAGTCTGGCAGCACTACATGATGAGC  
TCTATGATATTAGATTGCAGCATCTTGAGCTAACCCGAATAAAGAAAGAGAACCCAAGTGT  
AGCTTCACAAAAGAAGAAATTTTAGTCAAGCGGCTTGAAAAAGGATTCTTAAACAAGTATAA  
GAAAGAGGTGATGGAGGCAGTCAATTTAATCTTTTATTGCTGCTTAACAGCGCCTTGGTGTCT  
GCACTACAAATCACTAGAGGCATACCTTGTCGGACACCCAGAGATACTTGAAACAGAGTGCA  
TCAAAGAAAATGACATACCTCTTCTAGACTTAACTGTCACCAGTCTAATTAGGAGCCTCATTG

ATGATATTGAAGGTGAGTCAAGCTTTAATGATTCTTCAGATATTAAAGTCAGCTTTGCAGTTAA  
GTATTTGATAACCCGTGTTTACTGCAAATGGAGAGCCATTTTCCCTCAGTTTAAATGATGGTGA  
CTCAGTGATGATCTTCAGTTGACAACTGATGAGAAGCTACTATATCAAACAAAAAAGTTTTT  
GCTAAACTTGGCCTCTCAGGAAATAATTATGATTTTATTTGGACTTTGCAGATGATTGCCAACA  
GCAATTTTAAACGTGTGTAAAAGGCTTACAGGCAGAACAACTGGGGAGAGGTTGCCAAGAAGT  
GTAAGGAGCAAAGTCATCTACGAAATGGTTAAGCTAGTAGGAGAACTGGAATGGCAATACT  
ACAGCAGTTAGCATTTTCTCAAGCCCTGAACTACGACCATAGATTTTATGCAGTCTTGGCACC  
CAAAGCACAACTTGGTGGCTCTCGAGACTTGCTAGTTCAGGAAACAGGCACTAAAGTAATTC  
ATGCCACAACAGAGATGTTTAGCAGGAATTTGCTTAAGACGACATCTGACGATGGCCTTACA  
AACCCACATCTAAAAGAAACAATATTAACATTGGACTTGACATGTTAAGTACAGCCAGAGC  
ACTGGACGGGAAGCAGGTTTCATGACGTATTGCAANNNGTTAAATTTCTTTAAGGCAGCTCTG  
CATATCTGGTGATAACACCAAGTGGGGCCCAATCCATTGCTGTTCTTTTTTTTTCAGGTATGATG  
CAGCAACTACTCAAGGATGTTCAAGACTGGAGTTCGTTCTACAAGTTGACATTTATCAAAAAC  
TTATGCAGACAAATTGAGATCCCTGCACCTAGCATTAGGAAAATACTGAATGTACTTAGATTC  
AAGCTGAGTGACAAGGGAGGTGTAGAAAAGCTTTTACAAGAGGCCATAAGGTCAGAAATTA  
TCAACAATCTAGCAGAATGGGAAGGGAACGATACTGTAAATTTTAAATAACAACCTACATC  
AGTAAAGGCATTATGGCAATGAATAGCTACAACCATATGGGACAGGGCATTTCATCATGCCAC  
TTCTTCATTGTTAACATCCATGATGGCAGAGACATTTGAAGAACTTGCTGTTGATTATATGAAG  
AAGCATTTTCCAGGACTCACAGTGAATGTAGACCACGCAGGAAGTTCAGATGACTATGCTAA  
GTGTATAATAGTTTCTGGTTTGGTTTCCAAAGACATGTATAAAAGGTATGATGAAGTTTTTTGG  
AGACACATGTGTAGACTCAAAAATTTCTTAGCTGCGGTACAACGCTGCTGTCAGATGAAAGAT  
AGTGCAAAAACCCTAGTTGGAGATTGTTTCTTAGAGTTTTACAGTGAATTTATGATGGGAAAT  
CGAGTGACTCCAGCAGTCATTAAATTTATATTTACAGGATTAATAAACAGTTCTGTCACTTCTC  
CCCAAAGCCTGGTTCAGGCTTGCCATGTTTCTAGCCAACAGGGCATGTACAACAGTGTCCCT  
TGGAACAAATGCTGCTTTTACAATTCTTAGACAACAAATCTTTTACAACCATGTTGAGGATT  
TATTAGAAGATATGGACTAATAACGCTTGGGGCAGTCTCTCCATTTGGCAGACTTTTCTTACCT  
AGGTTTTTCAGGACTGGTCAGTTCATCAGTGGCCCTAGAAGACAGTGAACTATCTCAAAAGC  
AGCTGCTGAGATCAACTCCAACGACATTTTCTTCAATACGAGTAGTCTAAGCAACCTTGACAA  
ATTAGAACAAAGTCCTGATAGTTCAGGTTTAGATGATGATAGTGTAGTAAGTACAACCTACAGT  
AGAGTCATCAGACTCAAAAGGGTCATCATCAAGTTTCACTTTTGACTTAAACCGTCCGCTGTC  
GGAGACTGAGGTCAAATTTTTGAAGCTTTTGAAGAGATTGACATCAATAACTGCATGTGAAAT  
GCTACAAGAAAAGATAAACATTCTCTACAATGATTCTAGAGAAGGCCCTTTGGATAGGCATA  
ACATCTTACAAAACCTGTAGATTGTCTGAGTCATGTGATTGGTTGCTTGACGGTAAGAAGAGGG  
GTCTGCTTGAATTATCAAGAAGGATGTCTGTCTGCTCAATGTTTTGATTGCAGGTTATTATAG  
GTCATTTGGAAGTGAAGGAACAGAAAAACAGGTAAAGGCCTCCTGGTCTAGAGACGACAAT  
AGAGTTATTGAAGATCCTATGATTCAACTTATACCAGAGAAGCTAAGAAGAGAGCTAGAAAG  
ACTTGTTTTATCAAGGATGGAAGTGGATGAGTTAATGCCAGCTGTAGGCCCTGATGAGAGCCT  
TTCTCAACTAGTAGCAAAGAACTCATCAGCTTGAATGTATCAACTGAGGAGTATTAGCTGA  
GGTGTCAAGGTTGAAGCAGACTTTAACTGCCAGGAATGTGCTACATGGGTAGCTGGCGGAA  
TTAAGGAGTTATCATTACCTATATACACCATATTCATGAAATCTTACTTCTCAAAGACAATGT  
GTTCTTGACTTAGAAGACAGATGGAGCTCTAGGCACAGTACTAATTACAGAGATAGCACAG  
GTAAAATGTTGACAGGGAAAGTAGTAACCAAGTTTACCCACTGGTTGGATACTTTCTTGTCT  
GTGTTGTGAGTGCCAACCGTTCACAAGAGATTAAAGAATGCTCTCTTTTCAACCCAAATCTTA  
GATGTGTGAATATAATGGTGAAAGAAAACGGTATAAAGGAACTGTCTTACATTAGGAGCCAT  
TTATCAGTGCTTCTGTTGAATTTGAGAATTTGAACCTGCAATTTTCTGATGTAAACAGGCCAA  
AGCTTAAAATTGTTGAAAGTAGACCACCGGAGTGTGAATTGGAAGCAAATAAGGCAGTTATT

ATCAAATCCAAATTATTTAGTGCAGTGGAACATGTTAGACTTTCAAATAACCCTGCTGTTGTA  
ATGGGTTACCTCTTGGAAGAGTCTTCAATATCAGAGGTCAAACCTACTAAGGTTGACTTTTCA  
AATCTGCTGAAAGATAGGTTTAACTTATGCAGTCTTCCCTTCTGTCTTTACTTTACTGAGGTC  
TTTACAATCTGAATCAAAAGAATTAGAAAACTAGGTGAGCCAGTTGACATGCATCAGGTTTC  
AAAATATGCTAATCATCTGACTCTGCTCTGTAGAATGATACAGCAGTCAAAACCCTCATTGAC  
TGTCTTTTATATGCTGAAGGGTAGCCAAATGAATACGGAACCAACAGTTTCTGAATTAGTAAG  
CTATGGAATTAAAGAAGGTCGGTTCTTGAAGCTACCTGAGATAGGGCTGGATGCTAGTACATA  
TTCTGTAAGGTATTGGAAGATATTACACTGCATTTTCAGCAATTGGAGAGCTCCCTTTGAGCAG  
CAAAGATAAACTTCTCTACTTATAAGTTTTTTAAATTGGAAAGTAACTTCTGATTGTGTTGAT  
GATTGTTGCCATTAGAAAAATATGATAAGGCCATAGTAAGTGAATTTTCAGGACAAGTATTA  
ATCCACACTTTAGCTAGTGAAGTGAAGTCTGTTAGAAAGGACCAAGAAAGAGAGGGCCTAAC  
TGACCTGATTGATTACATTAATTCACCAAGTGAAGTGTGAAAAAGAAGCCTTATTTAGGTAC  
AACCTGCAGGTTCCAATGCTGGGGAGAAGGAGCCAAATCTGGAAAATTCACTTACAGCAGTA  
GAACTGGAGAAGCCATCGGCATCTTTGTGGCTGGCAAATTGCACATCCATCTTACTTCTGACT  
CACCTGGTTTGTCTTGTGAAGTCGAGAGGCAGGTCTTAAGCTGGCTTGGTAAGAGAAGAACTG  
ATGTGCTAACAAAGGAACAACATCAGTTCTTCTTAGACTTCCTTCCAAACCTTAGTGAGGTGG  
TGCAAAAAAACAGAGATGGTGCTATTCTGGGTGTTACAATAGACAGCACAAATGTCAGAATG  
CTGAAGTATGTCCCTCCTAAGAGAAATACTCCTGTGATTAAGATCAAGAAACAAATACTAAC  
AGTTAAGAAACAAACAACCTTTGGATGTGGAAAGTGAGCCAAGAATAGTCTGGGGACATGGTC  
AATTATCGATAGTGTATGATGAATGCGAACTGAAACCACATATCATGAAAACCTAATCAAA  
GTTAAAAAACTTGTGATCTGGCATCAGGAACAACAGACAAACTCCCAACAGCTATCTTTTCA  
GACACAAGGATCATTAGCCAGAGTGAAGTTTAAGACAGAGCTCCTGTTGAATTCATATGT  
TTGCTTCACTGCTTCCTAAAGCACACTAGCCAAGATGCCATCCAAGAAGTTGAGAGCAAGTGT  
AATGTGCTGGAAAGGTATCTAAGATCCGGTGGTGTGCAATTTAGACCGATGAGTGAGTCATTG  
GACAAAAAAGTAACTAACTTCCTTTACAGTGTCAGTCTGATAAAGACGTTGATAAAGAAAT  
TAACTTCTGTGAGGACTTGACTAGAGTCTTTTCTAATGAAAATGTGCCATTGAGTTCATGGTCA  
GAGGTCCAGTCTTACATAGAAGAGGTTGGCTTTGGTAATGTGCTTGTACATGTTGAGAAAAAT  
CCAACAAGAAGTGATTAAATATGGCGGTTTTCAATAGACTCAATCGGCGGAAATTTTCGGACCA  
ATAAAGGACATTAGAACATTAGTGACTTATATGAGCACTGAAACAGTACCAAAGTTTCTACT  
ACCCTTTCTGCTCTTTGAAGAGCAGCTTAAGCACCTTATAGCTGGCTGTGTAGAATTAAGAGA  
TGCACTAAACAGCTCAGGGATAAATGACCGAGAAATTGCAATTGTTGCGCTATTTACTTGTTT  
TTATTACCAATCTGACTCAGTTAAGAGGCAAGGGCCTGTATGCTCAATATCCTCATTTTGTAGT  
TTAATAGGAGATGATTTACTGCCACTTGACAACAGACTTCAAGCCAGAGTTCTTCCTGAACAG  
GACAATGTAACTTCACTTCAAACCTCAATCTCACAACAGACAGTACATTAGGCAAAAAAGA  
CAAAGCAATTCAAGCTAAAAAAATCATCAGCAGATATTTAAGGCTCATATTCACAGAAGATG  
ACATGGATTTAAAAAGACTCAAAAGTGATGCCACCAAAGTAAAACCTGTCGTCTGAAAAGGA  
GTGTGAATTCTTAGAATTTTACCTACACAGTGACCTTCTTATGCCTTGAACCTACAGGGTACTA  
TTAGAACATCTTATAGACTTAGAAGACAGAGCTAAAAAACTGCTTGTGTGCTCATTGAAGA  
ATTTATTCTGATGCTAACAGGAAGGTTGATGATCTCAAGTACAATTGACTCAGATAGCAAAAA  
GACATTAGAGGATGATGCCCTCTGTTTGGAGGATCTGCTTGATAGTGACAATGAGGCATCCAG  
CTCAAAGTCTGACGATGAAGAACAGATAGCACTACAACTGGTAAATTTAACTTCAACTGGG  
ATTGAGACTGAGCTCGGTTGCCATTAACAGTGACCTGCTAACTAAATCTGTCAACTTTTCTCAT  
CTTTAACTAGCCATTTATTAATAGGGGTGTGGGGGAACGATATCTGCAGA

>Nairobi sheep disease virus segment S (animal origin)

ACTCAAAGACAAACGTGCCGCTTTCGCCCCGAATTGCTCTTTGAACTTTGACCATGCAGAACCA  
GATTGTTCGAGACAACAAGGATGCCATCCTTGCATGGCACAAAACCTACAGCGAGAAGCAC  
AAACTTAAGTCTGTTTTGACTAATTCAGCTTCTTTTCTGTGAAACCATACTGATTTGTCAGGAT  
ATGAGGTTAGCATGAGGCTTGTTCATCTGAAAGTGAGAAAGATTTCAGTATATGCTTCTGCCTT  
GGTTGCTGCAACTAAGTTCTGTGCTCCTATCTTAGAGTGCGCCTGGACCAGCTGCACAGGGAT  
GATCCAACGTGGCCTCGACTGGTTTGATAACAACGGAGAGATGGTGAAGATCTGGGATGCAG  
ATTATGGGAAACTGAGAACGGAGGTACCCAGTCCTGAACAGTTACTAGGTTACCAGAGGGCT  
GCTCTAAAGTGGAGAAAGGACACCAAATATGGGATCAACAAAAACACAGCGGCATTGGCTG  
CTGCAATTGCAACCGAGTACAGAGTCCCTGGTTCAATTGTAGTAAACGTCAAGGACATGCTAT  
CCGACATGATTAGGAGAAGGAACAAAATCCTAAACAGAGACGGCAGTGAAGACGTTCCAAA  
GAGGGGACCTGTCAGCAAAGAGCACATTGACTGGGCCAGAGATCTTGACAGGGCAAGTTCC  
TTGTTGTTTTCAACCCACCATGGGGTGATATCAACAAGGCAGGGAAGTCAGGAATTGCTCTAG  
CAGCAACCGGCATGGCAAATTGATAGAGCTGGACGGTCCCAAAGTTGCAGAGGACTTGAA  
AGAGTCTCTGAAAAGCCTCGTGGCGTGATCAATGCCCAACAGGATGAAGTGGAGAATGGCA  
AAGAGGTTGTTGACGTTTGACCAAGCACCTGCAGAAAGCCCTTGAAGTACCAAGCAGTCA  
AGTGCCATGAGAGCTCAAGGAGCCCAGATTGACACTGTTTTTAGCAGCTACTACTGGCTTTGG  
AAGGCAGGTGTGACTGCAGAGATGTTCCCGACAGTCTCACAGTTTCTCTTTGAGCTAGGCAAG  
GTGCCAGAGGGAACAAAAAATGAAGAAAGCACTGTCAAGCATGCCTCTGAAATGGGGAA  
AGAAATTACTTGCACTCTTTGCTGATGATAGCTTCACTGCCAATCGGATTTACATGCACCCTGG  
AGTCTTGACAGCGGGAAGAATGTCGGAGCTTGGCGTTTGCTTTGGGGCAATTCCAGTGGCCAA  
TCCTGATGATGCAGCTGAGGGTTCAGGTCATATCAAGAACATACTGAACTACAAGACTGACA  
CCCAGGCTGGTAACCCCTGTGCCCAGAACATCGTTGCCTTGTTCAACATTCAAAAAGCAGGCT  
TCGACATTGAGAGCATGGACATAGTTGCCTCAGAGCATCTGCTGCATCAGTCACTTGTTGGAA  
AGAGGTCCCTTTTCAGAAATGCCTACAACATCCGAGGGAATGCCACCAGTATCCAAATCATCT  
AGCCGAACCGCTACCTGCTGCTTGCTTCTTTCTGTTTCTTTTATTTCTGCTTTTATTAACAAGGG  
GGCTGTGCGGCAACGATATCNTGCAGA

**>Nairobi sheep disease virus strain segment L (animal origin)**

TCTGCAGATATCAGTACCCCCAGGTTACAGAAGCATGGGTTCTGAACAGCATTCCCTTGGGAAG  
AGGTTGTTCCAGGGCAGTTCACTGCAAACCGGATTTTCAGGTCACGGATTACTTTGAGATAGT  
CAGACAGCCTGCTGATAGCTGTTTTACCACAGCATCGCTGCACTTCTTTAAGTTGCTAAATTAA  
AAAGGANNTTACATACAGACCTGTGAAGCAGCACCTTGAGTTGGCAGCGAGAAGATTCTTTG  
AGGAGGAATCCGAAGCCAAAGGACTAGGCCTGAGTCTTGAGAAGTATTTAGAGGTTGCTATG  
TGTGACAATGAGTGGGGAGGGAGTCTGGAAGCTTCGATGTTGGCAAAGCACCTAGACATCAC  
TATTGTCATATGGGTGATAGAAGGTCCTAGCAGAGTGGCTGCAGCAGTGAAATTTGGACCTGG  
AGATGTTGCTGGCGCAATAAATCTCCTACACACCGGTTACAATCACTTCGATGCCTTAAGACT  
GTTAGTTGATGACAGCCAAGTCAGCCGTCAACCTAGAGACATCACAGAACGCATAGAAATAG  
TTGAAGAGGTGCTGTCTGAAGACAGAGAAGAAACCTTCTTTGAAGAAGATCTGCTCAACTTTG  
CCACCACAGAGACTGTAGAAGAGAAGCTGACCAGGCAAGATAAGAAGGTTCAAGGATGAAAT  
GCAGCGTAGGGCAGCATTACTAGGGAAAATCATAAAGAAAGGTGAAAACATCCCTGTGAGA  
GTAGGAAGGGTACTTGACTGTCTGTTCAACTGCAAATTGTTTGTAGAGCTAAGAGATGGACTA  
CTGGTGTTAAAGCCAGAGTCGAAAGAGGATCCAAGCATGGGGTGAGTCTGAGGCAGCTAGG  
CCACAAACTGCTAACAAGAGACAAGCAAATAAAACAGGAATATGCTAAGTCTAAGCTATAC  
CTGACAAAAGATCTTTTGGACCACCTAGATGCTGGTGGACTCTTGCGCTCAGCATTTCCAGGG  
ATGGGATTAGAGAGAAATCTGCAGTTCTTGCACTCCGAGGTTCTACTTGATGTGTGCACAGTG

GTGTTGCTGTTCTACTGTCCTCCTCCTGTATGGGTCAAACAACAGAAACAAGAAGACATTC  
ATAACAAACTGCTTGCTGAACACGAGCCTTTCAGGGAAGAGAGTCTTCAAGGCATTAGGAAA  
GCTGACAGGTACCACTCTTTACAGAAGTCCTAGGAATGCCTTGTCTCATGTGTGTCAGACTCTT  
TATGGCAAGATGATGGGTAGGCTACAGAGCTACATTTACAGTCATGAGTCCAATAAGTTTGTTA  
GCTCTACGAAATCTCGACTTTGACAACATGTCTGTTAAAGACTACATGGAAATGCTAAAAGA  
GATGTCAGTGATAGACAATACAGATGTTGACTACACCCACAGAGAGATTGCTGACCTCAATC  
AGCTCACAGATAAGCTTCAAAAAGTTATTTAAAGAGGGAAGGGCAGATGAGCTGAAGAACTG  
GTACAAAGAGGAAGAATTGACAAAGCGGTCATTGAGAAGTGTGCAAAATGCATCTGAGTTTT  
TAATAAGTGACTATTTTAAAAAGAAGGACATTATGAAGTTTATATCAACAACAGGCAAGGGC  
ATCAAGCACTGCAAAATATTGGCAATGTCCTATCTTACGCACATAATCTATACTTGAGCAAAGA  
GAGCTCTAAAGATGACTACAGAAGACACAACACAGCTTCTGATTGAGATAAAGAGATTATAT  
AGGCTTCAAGGAGAACAAGCATTGAGCCAATTGCAACAATATGTGATAAGCTTGAGGAGCA  
ATTTAGAAAACTATTCAAAGAGTTGCCTGAAGAATGTTCACTNGAGTGTGAGACTCTGTTCAA  
TGACATTAGAACTCTGGTAGTCACAGTACAGCATGGAAGCATGCACTGAGGCTTAAAGGTA  
CTGCTTATGAAGGAATGTTCTCTAGGCAATATGGATGGTCATATATTCCTGAAGATATAAAGC  
CGAGCTTGACAATGCTGCTTATACAGACTCTGTTTCCTCATAAGCTTGAGGAATACGTTTCTGG  
ATCGAACTCAGCTCCATCCAGAATTTAGGGACCTGACACCTGACTTCGCCTTAACTCAGAAGG  
TGTACTTCAAAAAGAACAAGATCGTGGAATTCAAAACACCCAGTTAGTAATTGACTCAAGC  
TTAGAGGGGTCTGTTGAGGCTGTTCCCGTGGTGGAGAAGAAGATGTTCCCTCTACCTGAGACT  
CCAGTTGACGAAGTACACTCCATCCAGAGGATTATGAAAAGTTTCAGAGACAAAGTTGAAAA  
TGACAAAAAGAGAAAGGAGGAAGAAGGTGACAAAGCACCAGCAAGTGAAAGCATGGAAGA  
CCAGAAAGGTGGTAGTGTTCAAGACCAAGACAAGCCTGCTCCATAACCAAGAAGGCAATG  
CAGGAGGAGTCAGAAAGAGCAGGAGAATCCAAGTCCAACCTGGAATCAAGGGGAGCTGACA  
AATTACAGCCAGTTTTAGCATCAACAGGCCCCCGTGGCATGGCTCAAAGTGCAACCAGAGGA  
CCACTAACATACAGTGACAGAATTCTTATTGATGAAAACAGTACAGAACTAACAGAAGAAGA  
AGAGTTGGAAGAGAGACAGATACTACTGGTTGAAGTTGGTTACCAGACCGATGTGGATGGCA  
AAATAACAACAGACTTCAAGAAGTGGAAGACATCTTGAGGCTTTTGAAATGTTAGAAATT  
AAGTGTTCTTTCATAGCCTGCGCAGACTGCACATCAACACCTGCAGACAACCTGGTGGATCTCA  
GAAGACAAGGTACGTTGTCTAAAGTCCTCCATAAGTCACCTGTTTAGCAGCCTCACAAGAA  
CTCTCCTGCGGATGTCACGGACATAGTGGTTGGCTCTATCAGCACACAGAAGGTGAGAAGTTA  
CTTGAAGTCTGGATCAGCAACCAAGACACCTGTCTCCAGCAAGGATGTTAAAGAACTTGGC  
AACGTATGCGACAGAACATAATAGAAAGGCCTACAGGGGCCATCATCAATTCAGGCCTTGAG  
AGTGCCATGAGACAAGGATTAGTTGATGGAGTTGTGATGTCAAAAAGAAGGGTGTGTGAAAC  
CATTGAACTTTAAAACAAAACCTGTGACAGGATCACTGATGAGTTGAAAGAACAAGTACA  
AACATGAACTAAACGAAAACAAGACAACCAGTGAAAAGCTACTTCTGGGATGGTTGTCCGA  
GGATCTCCAGGGTTGCAGATGTAGCAACTGTTTAAACATCATAAAACAAACAGTTGAGAGTA  
TAACAGAGAACTCAGATAGGCTTGAGTATTTAGCAAGTAGCACTATCCTCAAGTCGCACTGCC  
CTGATTGCCATCCTAGAGGGGTTAGTGTTAGCAATAGCACCAATATAATGAACAGACTGCCTG  
GGCTAGAAAAGACCCAACATTCCGACAACAAAGGCTTTGAAGACACAAATGAAGCTCTGAC  
AGATCTAGATAGAGTGGTCCGGTTGACTTTACCCGGCAAAACAGAAAAAGAGAGAAGAATC  
AAAAGAAATGTCGAAACACTAATCAGGCTAATGATGCAGGCGTCAGGCCTAGAGTGCATAA  
AACTCCCTTCAGGGCAGATTATCACCCACAGACTGACCAGGAAGATCAAGCAAGAAGATGA  
AAATGTTTTATCAGACAACTGACAGAAAGGCTGGAAAGAATTAAGAAGGAACTCTCTGATG  
CAAAATTGAGCAGTTACTCAGAGTATGTGAAGAAAACCTTAGGGCACTCCATACAAAGAGTG  
GATAAACAGAAGGAATCCAAGTGTTCAAGTGCTAGAGCATGGCTAGAGAAGCTTTTAAGAGA  
TTTGAAAGTTCCTACCAAAGATGAAGATATACTAACAATATTAGAGAGTCAATGTCAAAAA

AGACTAACTTCATTAAAAACAATGACAGGCTTGTGATTAGATCTGAAGAAGAGTTAACGAGA  
TTTGTGAAAACAGGTCTGTACAGTTAATGCCTGACAAGTCTAAGAAGCTCTTTCAATCTGATT  
GTATCCTCTTCAAAGAAGTCACTGCTGAAGCAATGAAGCGGTATTATTCAACACCGTATCGCA  
GGAGTTCCGGCAGATGATTGTGCTACTAATAAACTTCTTATGCAGATTCCCTTGGTTCCAAGA  
GGTTGTTCTCTACGGGAAAATCTGTGAGACTTTTTTGAGATGCTGTACTGAGTTCAGTCGTTCT  
GGAATTAAGCTTGTCAAGGTGAGACACTGTGATTTAAACCTAGCAATAAAGTTGCCCTCTAAC  
AAGAAAGAAAATATGTTATGTACTCTGTATAGCAAGGAGATGGAAGTCTGAAAGGACCCTT  
CTTCCTCAATAGAAGACAGGCTGTCTTAGGTGCTTCGTATCCATACATAATCATCACCTCTAC  
ATGCAAGTTTTACAACAGCACAGGTGTCTTGAGGTCTTAAGCACAGTTGGTGAAAGAACATTT  
GAAAACATCAAGACTTGCACCTCAGACCTGATAGCTAGCCTATCATTAGAAGTGCATATGCT  
GTCAATGGGCAGTTTGAGAAGGCTTATGAAGTTAGAACAAGGCAGTGCAAGCTAGGAGGTAA  
CTTTTTAAACAGAAGCAGCAGAGACCCTTCATTACTGTGATCTCAGGTTTAAACACTGTTTAT  
GGACTTATTGTAAGGGATAACCTTCTTGCAAATTCCCAACAACAAAACAAACAGCTTCAGAT  
GCTAAGATTTGGCATGTTGTCTGGCTTGAGTAGGCTTTCGTGTCCAAAGGAACTAGGAAAAAA  
GTTTTCCACGAGCTGCAGAAGACTCGAGGACAATATCATGCGGCTCTATCTACAAAGCACTGT  
TACTGTTCAAACAGGGACGTTGAACATAACATCAATGAGTGGAAGTCGAAAGATCTATGTC  
CTGAAGTTACAATCCCATGCTTCTCTGTTTACGGTGTGTTTGTGAACAGCGATCGTCAGTTAAT  
CTTTGACATTTACAACGTGCATATCTACAATAAAGAGATGGACAATTTTGATGAAGGATGTAT  
AAGTGTGTTGGAAGAGACTGCCGAAAGACACATGCTCTGGGAAATGGATCTACTTAGGTCAT  
TAAGCAGAGAGACAAAAGATGAGAGGTCAGCAAGGCTTCTATTAGGATGCCCAAATGTCAG  
GAAAGCAATCGACAAGGACGGCAACAACTAAGCAAGGCAGGTAGCACATCTCCCGATGAC  
GGCGACAGTGACTCATCAAGCTTAAGTGGGAGACGTTCTTACTGCTCTAGTAGAGGGAGGATT  
CAGAGCATATTTGGCAGGTACAATTCCAACAAGAAACCTTTTGAGTTTAGACCAGGTCTAGAA  
GTTAGAGCAGATCCAATGAATGATTTTGAGCAAGCAGTCACAGACACATCGCAATATGCAGA  
GTACACACCGAATCAAGAAAGCTTAATGAAAGATTTTATCCAATTATAAGGACTAATCCTA  
GTCACACAATGGGCTCTTTTGAGCTCATTCAAGCAGTAACAGAATTTCGGCCGAAGCAAGTAC  
CCAGCAGAGAACATAGAAAAAGCTAAAAGGGACCCAAAGAACTGGGTGAGTATCTCAGAAG  
TAACAGAAACAACAAGCATTGTTTCACAACCCAGAACACACATAATGCTCAAAGACTGCTTT  
AAAATTCTTCTCGGTACTGAGAATAAGAAGATCGTCAAGATGCTAAGGGGAAAGCTGAAGAA  
GTTAGGTGCTATAAACACTGATATAGAAATTGGAAGGAAGGACTGTCTGGACATGCTAAATA  
CCGTTGAAGGGATATCAGAAGAGCAAAGGAAGAACATTGTTAATGGAATTTTGAGCCTTCT  
AAATTGTCATTCTACCACTGGAAGGAACTAGTCCAAAAAGATGTTGAGGAGGTGCTGCTGAC  
TGATGATGGCAACTACATCTTTTGCTGGTTGAAAACACTGTCATCAATGCTGAAAGGGGCTTT  
GAAGAAAGAGCTCCGATTCATGAACAATGGAGGTGTGCTAGAACTCAACAGTGGATTCTTCA  
GTGAGGATGAATTTGAGGAGCTGCTAAACGTCAAAAAAGAACTGACTGGAAACATGAGTCTA  
GACAGAGAGTTAAACACAGAGTTACTTTTGGCTTCATGGCTGAAGTGTGTCTACAAGCCCAA  
GAAGGGGCCTCAATAGTGCAAGAAGGTTTAGAAGCACTGAAGGCGATGGCAGGAGAACTAT  
ATGAAATCAGATTGCAGCATTGAGCTAACCAGAATGAAGAAGGACAATCCTAGTGTAAGC  
TTCACCAAGGAAGAAGTTCTTGTGAAAAGGCTTGAGAAGTCATTCTGAAGAAATTTAACAA  
GGAAGCAATGAAGTTTGTTAACCTGGTGTCTTCTGTTCACTCTCTGCCCCGTGGTGTGTTCAAT  
ACAAGTCTTTAGAGTCTACTTGGTCCGTCACCCAGAGATCCTTGAGCTAAAGGCCAAAGGTG  
ATTTGGGATCTGTGATTTTAGACCTTTCGGTTGCATCGGCTATATCAAGGCTAGTCCAACAAGA  
AACAAACAGTGAGCTAGATTGAGAGGTGTTAAATGAGATGAAAGTGCGCTTTGCTGTCAAGT  
ACTTTGTAACACTGTTTACAGCTAATGGAGAGCCTTCTCACTTAGCCTGAATGATGGAGGTCT  
AGATGAGAATCTACAGAAAACCACAGACGAGAAGCTGTTGCATCAGACAAAAGTAGTATTT  
ACTAAAATCGGATTGGCAGGAAACAATTATGACTTCATGTGGACTACGCAAATGATAGCAAA

CAGCAACTTCAATGTTTGGCAAGCGTCTGACTGGTAGAACAACCTGGTGAAAGGCTTCCCAGAA  
GTGTGAGAAGCAAGGTAATTTATGAAATGGTGAAGCTTGTTGGAGAACTGGAATGGCAATA  
CTACAACAGCTGGCCTTTGCTCAAGCCCTTAATTATGACCATAGATTATCTGCAGTANTAGCA  
CCTCAGGCGCTGCTTGGAGGGTCCAGGGACCTGCTAGTACAAGAGACTGGAACGAAGGTCAT  
CCACGCCACAACAGAAATGTTTCAGTCGAAATTTACTGAAAACAACACAAGACGATGGTTTGA  
CAAACCCCTCACTTGAAGGAAACCATACTGAATGTTGGACTGGATGCACTGAGCACGATGCGC  
TTGCTAGACGGAAGGCCAGTGTCTGAAGACAGCAAGCTTCTGAACTTTTACAAAGTAATCTGT  
ATATCAGGAGACAACACAAAGTGGGGTCTATACACTGCTGCTCTTTCTTTTCTGGTATGATTC  
AGCAGCTTTTGAAGGATGTGCCAGACTGGAGTTCATTCTACAAGCTTGCTTTCATCAAGAATC  
TTTGCAGGCAGGTTGAGATTCTGCTGCCAGTGTAAAGAAAAATCCTGAACACACTTCGGTTTA  
GACTTAGTAACAAAGGAGGTGTTGAGTCAAAGTCAGAAGAGGAGCTCAGGAAAGAGCTAAG  
CGATAGCACTGAAGAATGGGGAGACAATGACACTGTCAAGTTTCTGATCACAACCTATCTAA  
GCAAAGGAATCATGGCACTCAACAGCTACAATCACATGGGTCAAGGGATACACCATGCCACC  
TCATCATTGCTGACTTCGTTAATGGCAGAACTATTCTGAAGAACTAGTGATAGACCATTTTAAA  
AGGCATCTACCACAGCTCACTGTCAACGTGACACATGCTGGAAGCTCTGATGATTATGCGAA  
GTGCATTGTGGTCACTGGGCTTCTGCCTAAAGAACTCTACGACAGGTATACTGAAGCTTTCTG  
GAAGCATGCATGCAAAATAAAGAACTATACTGCAGCCGTCCAAAGGTGCTGTCAGATGAAGG  
ATAGTGCGAAGACATTGGTAGGAGATTGCTTCCTCGAGTTCTACAGTGAGTTCATGATGGGCA  
ATAGAGTAACTCCAGCTGTGATCAAGTTCATATTCACTGGCCTCATAAACAGTTCAGTGACTT  
CACCACAGAGCTTAGTGCAAGCCTGTCATGTATCTTCTCAACAAGCAATGTATAACAGTGTCC  
CGTTGATGACTAATGCAACCTTCACTCTTCTTAGACAGCAAGTTTTCTTCTCACATGTGGAGGA  
TTTTGTGCGCAGATATGGGCTGATTACACTAGGCACTGTGTCATCCTTCGGTGCCTGTTTGTTT  
CCACGTTTTCTGGCCTAGTTAGTTCTGCGTTGCCTTAGAAGACAGCGAAGTCCTGGCGAAGT  
CAGCTGCTGAAATCAACGAAAACAACATTTTTCTAGATAGCAGCAGTCTCTCCAATCTAGACA  
ACCTAAAAGACACCGACAGTGCTAAAGCTAGGGATGATGAGAGTTCATAAGTGAGACCAC  
AATTGAATCCACTGAATCAGGAAGTTTCTTCTAGTTTTCACTTTTGAGCTGACAAGACCGCTA  
TCTGAAACAGAACTGCAGTTTTCTCAAAACATTAAAGTCGACCACTTCTGTAACTGCATGTGAA  
ATAATACAGGACAAGCTGACTCCACTATATGCAGACAGTCAAGAAGGTGCGTTAGATAAGTA  
CAATGTGCTGTACAACAGCAGATTGACTGCTTCTTGTGATTGGCTCAGACAAGGAAGGAAAA  
GGGGACCTCTTGAATTAGCTAGGAGGTTGCAATGTATCTTGAACATTCTGATTGTGGGTTATTA  
CAGATCATTGGTAGTGATGGGACAGACAAGCAAGTCAAGGCATCCCTCAATAGAGATGACA  
ACAGAGTCATCGAAGACCCCATGATTCAACTAGTACCTGAGAAGCTAAGAAGAGAGTTAGA  
GAGATTAGGAGTCTCCAGAATGGAAATCGATGAACTTATGCCTTCCATCAAGCCTGATGAAA  
CTCTCTGTCAGCTGGTGGCCAAAAAACTCATCAGCCTGAACGTTGCAACAGAAGAGTACACT  
GCAGAAGTCTCTAGGCTGAAGCAGACCTTGACAGCCAGAAATGTCTTGCACGGCCTTGCTGG  
AGGCATCAAGGAGCTGTCACTTCCAATTTACACCATCTTCCTCAAGTCATACTTTTTCAAGGAC  
AATGTCTTCTTAGACCTAGAGGATAGATGGTCAACGAAGCATAGCTCTAATTACAGGGACAG  
TTCTGGTAGAATGCTAACTGGTAGAGTAATCACAAAATTCATCATTGGTTAGACACATTTCT  
GAACTGTACGGTGAGCATTAAACAGGACACAAGAAATCAAGGACAATTCTCTTTTCAACCCTG  
ACCTCAGATGTATAAACATTCTAGTGAGAGAGGACAATGTGAAGGAGATGTCAATTGTTCAA  
AGCCACCTTAGGGTTGTCACTTCAGAATTCAACAACCTCAATCTTCAGTTCTCTGACTGCAAC  
AGACAAAAACTGAAGGTGGTTGAGTCTAGACCGCCTGAATGTGAGCTAGAGGCCAATAAGG  
CGGTAATTGTAAAGTCGAAGTTGTTTCAGTGCTGTTGAGCAGGTCAGACTTGCAAATAACCCTG  
CAGTGGTTATGGGCTACCTCCTTGAGGAGTCATCAATCTCAGAAGTGAAACCCACCAAGGTA  
GACTTTTCTAACCTGTTGAAAGATAGATTCAAACCTGATGCAGTTCTTCCCCTCCGTCTTTGCTTT  
GCTGAAGCACCTTCAGTCTGAGTCGTCAGAGATGGAGAACTAGGGGCACCAGTGGATATGC



AGCAGGTGTCAAAGTATTCAAACCATTTGACACTATTGTGTAGAATGATACAGCAGGCTAGG  
 CCTTCGCTGACAGTTTTTCTACATGCTGAAAGGCAATCAGATGAACACTGAGCCTACAGTGTCT  
 GAGCTGGTCAGCTATGGGATCAAGGAGGGCAGATACCTAAGACTGCCTGAAATAGGTCTTGA  
 TGCCAGCACATACTCTGTAAAGTACTGGAAAATACTTCACTGCATTTCTGCCATAGGTGAATT  
 ACCACTTAGTGACAGAGATAAAACATCCCTACTTATAAGTTTTCTCAACTGGAAAGTTTCATC  
 TGACTCAATGGCACAAGATTGTCCGCTTTACAAACAAGAGCATGCTGTTATCAGTGAATTTGC  
 AGGACAGGTTGTTGTGAACACTCTTGCTAGTGAGCTCAGCTCTGTTAGGAGAGATGCTGAGAG  
 AGATAGCCTTACTGACCTGATTGATTATGTGAATTCACCTACAGAGCTACTCAAGAAAAAACC  
 CTACCTCGGTACAACATGTAAATTCACTACCTGGGGTGAAAACAACAGGAACGGCAAGTTTA  
 CATAACAGCAGTCGGTCGGGAGAGGCAATTGGCATCTTCATTGCAGGAAAACCTCCACATACAT  
 CTGAGCAGGGAATCAACTGGTCTGCTATGTGAGGTGGAAAGAAATGTGCTTGGCTGGCTTGG  
 GAGACGTAGGACAGATGTACTAACAAGGAGCAGCACCACAATTTTTAGAGTTCCTTCCTA  
 CGCTAAGCGAGGTGTCACAAAAAATAGGGACGGCACCACACAAGGTCTATGTCAGGACAA  
 CACAAATGTCCGTATGCTGAGATTTGTGCACCCAAAAAAGAACACTCCTGTTGTCAAGATCAA  
 GGGGCAGATTCTGACAGTGAAAAAACAGGTTAGTTTTGAGGCAGAGAGTGAGCCTAGACTCA  
 TGTGGGGGCATGGTTGTGTCTCAGTAGTTTACGATGAGTGTGAGACTCAGACTACGTACCATG  
 AAAATTTACTCAAGATAAAGCAGATGGTTGATAGCACAACCTGATAGAGCTAGAAGCCTCCCA  
 CAGTCAGTATTCTCAGACACCAAAGTGATTCTTGCCAGAATCAAGTTCAAATCCGACCTTCTG  
 CTGAACTCACTTTGCCTGTTGCACAGCTTCCTAAGACACACAACACTACTGATGCTGTGCTGGAG  
 GCAGAAAGCAAGTGTGCACTGCTAGAAAGGTACCTGCAGTCAGGAGGGGTGAGAGTAAAGT  
 CAGCAGATGAAACTTTAGAGAGAAAGTTATGCAGCAAGGTGATAGAATGTAAGCTTGAGCAA  
 ACTCTTGATGAAGAAATTGAAGTCTGTGATAGCCTCAACAAAGTGTTCTCCGAGACTCCTGTT  
 CCCGTCAGTAGCTGGTCGGAAGTGCAGTGCTACATTGAGGATGTGGGCTTCAGCAACATCCTA  
 ATAACACTTGACAAAACAAGCACTAAGGGAGAACTGATCTGGAAATTTTCTCTAGACAATAC  
 AAGCAACATAGCTGGTAGCATCAAGGACATAAGGTGCTTGTTCCTACATAAGCACCGAAA  
 CTATACCAAAAATTCTTGCTACCTTTCTGCTCTTTGAGAACCTGCTCTCCAGCATTCTCAAGCA  
 AAGCTTGACAGTGAAGGAGACATTACATGCTACAGGCATCTCTGACAAAGAAATTGAAGCAG  
 TTGCCACCTTATTTGCTTTCTGCTTCCAAAACGACAAGGTCAAAGAAAGAGGCCCCCGATGTT  
 CAATGTCCTCTATCCTAACTTAACCAAAGGTGATTGGGTGGAAGTAGGGCAGAGAATGAAA  
 CTTCAGGCACATCTGGATTCCGACACTGTCCGGCTGAGTGTTAGTTCAGTTCAGCAATCTCTACCGAT  
 GCAGATCAAACAGCTGATAAAAAAGCTCGAGTGTCAATGGCAAAGAAAGTGATAGCTTCTCA  
 ACTAACACTACTACTGCAAGAGGATGGTATTGACATTAAAAAACTTAAGGACATAGCTGTTA  
 ATGTTCAAGTTAGGAAAGAAAAAACTGGTGAGGTACTAGATTTTACACTTCTTGATGACCAAG  
 CAGGTAACCTGAACTATATCGGAGTGTTGGAGACAATAATGGATAGAAGAAAGAAAGGTCTCT  
 GCCATCAGTGCACCTGAAGACTTCTTTCTTCTACTAACAGGCATGGCCGAAAGCAACATACAA  
 CAGGACACAGCAATCAAAAGTGAAGAAGCTTGCAGTGACGACATATGTCTCGAAGACCTTCT  
 TGAACCCAGTGAGGAATCATCCAGCAGCTCCGGTGCGCAGGACAAAGAAGCTGTACCCGAC  
 AGAGTAACATTCAACTGGGATTCTGACAGTGATTGATCTTCAGTGTGTATACTAAAAGTTTAA  
 ATTAGTAGGGGTGTGGGGGGAACGATATCTGCAGA

**>Nairobi sheep disease virus segment M (animal origin)**

TCTCAAAGAAAGACTTGCAGCTAGCAGGTTAATCTCAAAGGCAATCAAGATGGCATTAGTGG  
 CAAAGGGTTTTAATCCTCATACTACTACTATATATGTTCTAGGAGCCTCTGAAGTCAACCTTGA  
 ACTCCCCTAGTTGGAACGGCACTGAAGGGACAGAGTATGCTGTTGAGAGGGCTTGCCCACTG  
 AACCTCCTTCAGGAACAGGAGCCCAAAGTAGAAGCAGTTAGCACGGAAACCCTGGACAACC

AGCACCTCCCAAGAGGCTACTGAGAACACCATCGAGAGCCCTGATGGAGGGGAAACAATGG  
CACCCACAACCCAGCACCTGTGACTGATTCAGCCAGTAACTGGAAGAGAGGAGCCAGGC  
ACAACCCAGCAGGCCAGTCAACTCAAATGCAGAACAGCCAGGCACCGATAGGAATGCCTG  
AAGCCTGGTCGACAAGTCCCTCCAGAGTTGGTAGAAAACCTCGTTAAAGTGCTAGCCCTGAT  
GTGTCTGAGCCAGACCAGAACACAGAAGCACAAACACATCCACCAGTCTGCCTTGACGGACG  
GCCTGTAGAAGAAGAAGAACTCAGTTGGCACAAGAGATGTAGCTAGTGATCTAAGAGAA  
GTACAATCAAATGAAACAACTCTTGAGCCAAAGAATACTAGCAAAGATGGGTATGGCTGTAG  
ACTTTACCGATGATGAGTTGGACACTTGGTGTTACAGAAGATACAGCAATTGTAGCTCAAATG  
ACATTGAATCAAGAATTAGGGACTTCTTCCTCATTACTGATAGGTCTGAGTGCTTTGATGAAGT  
CCTGGTGAAAAGATTGTGTGAGACCACCAGCCCGATTATAGATAGGGCTTGGAAGATAGCAG  
GACTCAAAGAAGAAGTTGTCTTGAGGGAGATGGGAAGAAGGATCTTTAGGTTTTTTACACCTG  
CCCTAAAAGTGACATGCATGTCTGGCTCATTAATCCCTCTAATCAATTTGTAAGGTTCTACAA  
TCCCACCTTAGAAAGGACATCAGGCCCTACCATCCAAAACCTACGATGGCATGCACTGTCTAA  
ACATAGAGAATGGGCTCATCAAACCTTCCAAAGTGTTGTTATCAATGTTCTGATGACCACAG  
TTGACATCAGACTGGAATCCTGCCGAGCATTCTATAATGCTCAACAGTGTACTTATACCCAAC  
ATGCTGATGGACTGGTGAGGGTGCCTACCTTTGTGGGTCCTCATGGTGAAAAGAGGATTATTG  
GTGCCTATACCATGAGCTTCAACCTAACTGATGAAAAGAACAAGCCTGCACAATCAAGACA  
ACTTGTGTTGTTAAGGGAAAGGAAGTAAAAAAGGGACAAAGCCAACCTTAGAGGTTTTCTAC  
AACTATCAGGCTCTTTAAGTCTGTAACAGGAAAGAGAAGGCTCATGTCAAATGAAGAAGAGT  
GGACTGAATGCGGTTACAGGACGCAACTAAACATGGCAACAGCTGTCTCAGTGCACAACGAC  
AAGCTAGGAGGACCTGGGAAAAAGCTCACTATCTGCAATGGAACAACAGTCTCAGACATTGC  
TCTAAACGAGGGTCTTGGGTGCTACACAATAAACAAGATCATTACAGGGAAGGTCTGCAAGA  
CAGGCAATACAACAGGTTCTTGTGAAGTGCAACCAGAGCTGCAGAAATGTGAGACAGGAAA  
ATGCATACTGATCAAGCAAAAGAACAAGGGTGTGTGAAATTGAAGAGGGGCAAGACTGTG  
ATTATAACGGAATGCCAAGGAAGCTGTCTTTTTGCAATACCACAGGACACGGGAGACATTAC  
AATTGACTGCTCTGGTGGAAGACAGCATTACCTGGAGATCAACATTGTAGATATACACTGCCC  
AGGGAAGGATAAATGGAAGGGCTTCATGCTCTACATATGCAGAGTCTCAAGCAGACCACTCG  
TTGCTCTAACATTTGGAATATGGCTTACAGCAGGCTACTTGATAACTTGTCTGGCCTCCTTCAT  
CCTGTACAATGCCATACTGCTTATTAGCATTGCAATCAAGAACTGAAACAGAAGAGAGAAA  
AAAAAGGTGACCTATGTATAAAGTGTGAGCAGCACTGCATGAACCTGTATGATCAGGAATTG  
CACGAGCTAACTGCAGCTTTAACCTATGTCCTTACTGTGCTAATAGGCTCTCAGACGATGGG  
CTCCCAAGACACGTGCCAGATGTCCCAAAAGGGGAGAGAGGTTAGAAGAAATTGAGCTCT  
ATATCAATTATACAAGAGTACCCTGTCTTCTGCGGTGGGCGCTCTCAACTTCTGTCCAAGTTGG  
CACAGTTATTAAGATTGTCTTGGTTCGGCGTGCTACTAACAATTCTTCTTGACGATATCT  
CCTGTGCAGGTGCTGCTTGTCCAGGTTGGTAAATCCTTTAACCTTAGCAATACGTAACCTGACA  
GCAACGGATNATCTGCGGAGCTCCGGCCGGTGCTGCATCAGGATCTGCAGAGAATCCCAGGT  
GCTGCTGTCCAGGTTTGTGTAACCTTTAACTCAGCAATACGTAACCTGAACGAAGTATTATTCG  
TTCAGTTACGTATTGCTAGGTTAAGACTACTTTCTGCCTTTGCGAGAACAGTTTACCTATTGCT  
AAGGAGCTACTTCGTTTCAAGTTAANGTTACACAAACCTGCGGAGGTAAAAAGAGATTCTCANA  
AGAAGCTGCAGATCAAGAGCATGTGCCTGAACAGGATGAGTGCCTGTGTCCCGGAGAACATA  
GGGCTGGAAGGAGGCTCCTTTTTCTGAGCGGCCTTCAAGATGCTGCAAGGAGGATGACAGAG  
TCTCACAGACTACTTACAAGTGTCTCGATTGATGCGCCCTGGGGTGCGATAAACATTGAATCC  
ACTTTCAAGCCTCTTCTTGACATCCAACATTGACTTGAGTTGGAACCTCAGCAGAAGAACAG  
GGAGACAAAATTGTACTGTCAGGTAGATCCACAGGTATCATAAAGCTACAAGAGAGGACTGG  
TCTGATGTGGAATAATGTCATCTGAAAAGGCTTCTGAAAGTAAAAATCTTCTGTGTCTATAAT  
GGACTTCTCACAGCTTTACAACCTCAATTTCCAGTACATCACAGGTGACAGAAGCCTTTCCGA

ATGGCCAAAGGCTGTATGCACAGGAGAGTGCCCTGACAGATGTGGGTGTCAAACCTCCACTT  
 GTTATCATAAAGAGTGGCCCCACACCAGGAAGTGGAGATGTAACCCTACGTGGTGCTGGGGC  
 ATCGGAAGTGGGTGTACTTGTGTGGAATGGATGTTGAAAGGTAAGTCAACAAGTACTTTGGG  
 GTAAAGTGGGCATTGGAGTATGTAAGAAGTATGATGTGGTGGTTTGTGTGGAGCTGACCAATGAG  
 GAAAGACACTGTGATTTAGTTCAAGCTGGCAGTCGCTTTTCTATAGGGCCAGTCTCTGTGACA  
 CTGTCAGACCCTCAAAATGTGGTAAACAGACTATCAAGTAGCATAATGACAATACAGGAGAT  
 ATCAGACAACGGGATCTTAGATGTCATGCATGTTAGTAAAGTAATTTACAGCAGAAAATGCTTG  
 CAAACTTCAAAGTTGCACACATGGGAGCCCAGGAGATCTCCAGATCCTTCACACTGACAACT  
 TAATAAAAGGTGAAATGTCATCCGGCATAAATCTTGCTCACCTGGACCCTCAGGTAAACACAA  
 GTTGGATGTCGTGGGAGGGTTGCGATCTAGACTACTTCTGTACAGTGGGAGATTGGCCTAGCT  
 GCACGTATACAGGAGTGAAGTCCATAAATACAGACAGCTTCACAAACCTCATAAACACAGAA  
 ACTGATTATACAAGCAAGTTTCATTTCCACTCAAAAAGAATTTCTGCTAGGGGTGACACTCTG  
 CAGATGGATTTAAAAGCAAGACCAAACGTTGGAGGTGGGGAAATGACAGTTCTGGTGGAAAGT  
 GAATGGCCTGGAGCTGCACTCAAAAAAATAAGCCTTAAAGGATTAAAGCTGTCTAACCTCA  
 AGTGCAGTGGATGCTTTGCTTGTAGTCCTGGTCTGTCTGTCACAGTGATTGCCAGATTAGAATC  
 ACCAGATGAGTTCCTACTATACATTTAAGAAGCACCAGCAGAGATGTGGTGGTTGCTGAAACCA  
 GTGTGACAGCTAGAAAGGCAGAAACGGGGGCCAAGAGCAGTTTTAGGGCCTTTGCTGTGAAA  
 GATGTTAAGGAGATATGTCTAGAGGTGGTTCGAGAAGGAATATTGTCCGTCTTGCTCCATAGAA  
 GACTTGAAAATTTGCATTAGTGTCACTCTTGAGCCTCCAAAGGACATTCTCATTGAGCATAAA  
 GGCACCATTGTACAGCATTACAATAAAAGCTGTGATGAGGGCTACAACTGCTGGATTGGATCT  
 GTCTCTGGGTTTTTTGTAGGGGTAAAGATTTTTTTGAAAAAACTTTGGGAGTGTGATCATTG  
 GAATTGTCAGCACAGTTCTTCCCTTGATACTCACTGTTTTGTTCTTTGTCTATGGAAGAAGGCTA  
 TTTTGTCTGTGCAGGTTATGTCACAAGAAATGCTGCAGAGGTTTCATCTAGAGGAAGAGACGGT  
 TACAGCAGACTGTCACAAGAAGAAGAAATAAAAGAAATAATAAAAAAATTCAACAGAAATG  
 GAGAGTTACTGGGAAGGGGCGAGAACGATAAAAGAACTGTAGCAAGGATGTTTCATGGATAG  
 CCAAAGTGCAAGAAAAGCAGTTAAAGAGGTTGCCTAGGCTCAATGGCATGCCTGTTAAACTG  
 CTTCTCAAACCTTAACCCAGCCACTTATATTCTCGATTCTATCATGCATGCTCACTATCCGATGC  
 CTAATTTTCCACTTAAATCTGAGCTTTAATAAGAACTAGATATTAATAACTGCTGTGCCGCCAC  
 GATATCTGCAGA

**>Middelburg virus (animal origin)**

ATTGGTGGTTACGTACACCTGCCAGCACTCCGCACTATCCGAGCGATCCAAAATGGCGCGCCC  
 TGTGTGAAGATAGACGTTGAGGCCGAAAGCCCATTTGTCAAGTCTCTACAGAAGGCGTTTCC  
 ACAATTTGAGATCGAAGTAGAGCAGGTCACACCGAATGACCATGCTAACCGGAGGGCGTTTT  
 CGCACCTTGCCAGTAAACTAATTGAAGGAGAGGTGGAAGTGGGCACAACCATCCTGGACATA  
 GGCAGCGCGCCGGCCAGGAGGATGATGTCCAAACATGCATACCACTGCGTCTGCCCACTGAG  
 GAGTGCAGAAGACCCAGAACGGTTAGCGGGATACGCGAAGAAGCTTATGAGTGCAGCCGGA  
 AATGTTACTGATCTCAACATCTCGGAAAGATCACGGACTTGATGAACGTGATAGCTATACCC  
 GACCTTGAGACACCTACATTCTGCCTGCACACAGACCAGACCTGCCGCTATAATGCCGATGTG  
 GCCATCTATCAGGACGTCTACGCTGTCCACGCGCCACATCGCTTTACCATCAAGCGTTAAAA  
 GGGGTCAGGGTCGTGTATTGGATCGGCTTCGATACCACGCCGTTTATGTTTGACGTAATGGCG  
 GGAGCGTACCCAAGCTATTCTACGAATTGGGCAGACGAAGTGGTGCTACAGGCCAGAAACAT  
 CGGCCTGTGCAGCTCCAGATTGAGTGAGGGGAGATATCTGCAGAGGGCNATCCATTATGAGA  
 AAGAAAGCCCTTAGACCAAGCGACCGAGTTATGTTCTCGGTAGGTTTCGACGTTGTATACGGA  
 GAGCCGCTCGCTACTGAAAAGCTGGCACCTGCCGTCGACTTTTCATCTAAAGGGTAAGGACTC

CTACACATGTAGATGTGACACCATAGTCAGTTGCGAGGGATACGTCGTAAAGAAGATCACGA  
TGAGCCCAGGCCTATTTCGGGAAGCCAGTACCGTACGCCGTCACCCATCATGCCGACGGCTTCC  
TCGTGTGCAAGACCACGGACACGGTCAAAGGGGAGAGGGTTNCTTCCCCGTATGTACGTAT  
GTCCCAGCGACGATTTGCGACCAGATGACTGGGATCTTAGCCACGGATGTTACGCCTGATGAT  
GCTAAGAAGTTACTCGCTGTGCCTAGAACCTGCGGAGCTCNTGCAGATATCGGGCGCACGCA  
GAGAAATGTAAATACTATGAAAAATTACCTGCTACCTGTGGTCGCCCAGGCCTTCAGCAAGT  
GGGCGAAAGAGTATAAAGCCGACTTGGAAGACGAGAAACCGCTGGGGGTCAGAGAACGCA  
ACCTGACCATGTGTTGCTTGTGGGCCTTCCGAACTAGGAAGACCCACACCCTGTATAAGAAGC  
CGGACACGCAGACTATAGTGAAAGTCCCTTCTGAATATACCTCCTTACTCATCCCGAGTCTAT  
GGACGAGCGGGATCTCCATGACTCTGAGGAGACGGCTGAAAGTGCTGCTGACTGCCCGACTG  
AACCAGAAATTGACGTGCCCTTTGGACGCGGTGACAGCAAAGATTGCAGAGGACGATGATCG  
TGAGGCGCGTGAAGCTGAGTTAACCAGAGAGGCGCTACCTCCTTTGACTGCTACCGAGCCAA  
CCGGCGACGATATACAGGTGACATCGAGGAGCTTGACGCTAGGGCGGGTGCGGGAGTAGTG  
AACACACCCCCGAACGCCGTCCGAGTACCCGCTCAGAGTGGTGACCTGTTGGTTGGCAGATA  
TCTGGTGCTCAGCCCGCAGACTGTATTGCGCAGTGACAACTACGCTTGATCCACGAACTGGC  
AGAACAAGTGAAGATTATCACGCATTCGGGTAGGGCCGGTAGATATCCTGTTGAAGGCTATG  
ACGGACGTGTGCTGGTACCTACTGGCAGCGCTCTGAGTTTCGCCGATTTCCAGGCGCTTAGTG  
AGAGTGCCACAATGGTATACAACGAGCGAGAGTTTCATGAACAGGAACTCTACCACATTGCC  
ACGCACGGCCCCGGCCCTGAACACAGACGAGGAGAACTACGAGAAGGTGAGAGCGGAAAGA  
AGCGACGCCGAGTACGTGTTGACGTGGACGCACGGAAGTGCGTCAAACGCGAGCAGGCGT  
CGGGAATAGTGTTAGTGGGAGACGCGATCAATCCACCTTACCATGAGTTCGCCTTTGAAGGCC  
TAAAAACACGCCCTTCGGTGCCCTATAAAGTACCGACTATCGGTGTGTTTGGAGTTCCGGGAT  
CAGGCAAATCGGCCATTATTAAGTCTGTGGTCACCAGACGTGACCTAGTCACTAGCGGCAAG  
AAAGAGAAGTGAATGAGATCATGACCGACGTCAAGAAGCAGAGAGGATTGGATATCGTAG  
CCAAGACGGTGGACTCTATCCTATTAACGGTTGCAAACACAGCCCTGAGGTGTTGTTTCGTAG  
ACGAGGCGTTTGCCTGCCATGCAGGCACTCTGCTCGCGCTCATTGCGATCGTGAGACCCACCA  
AGAAAGTTGTGTTATGCGGCGATCCGAAGCAATGCGGCTTCTTTAACATGATGCAATTAAG  
TCAATTACAATCATGACATATGCACTGAAGTGCATCAGAAAGCATCTCTCGCCGATGCACA  
ATACCGGTTACATCCATTGTCTCTACACTGCACTACGGAGGCAGGATGCGCACTACGAACCCG  
CGCAACGACCCTATCGAAATTGACATCACCAGTAGCACCAAACCAAGCCCCGAGTCTTGGT  
TTTAACATGTTACGTAAGTGGGTTAAACAGCTGCAGTTGGACTATCGTGAGACACGAGGTCAT  
GACTGCGGCAGCGTCGCAAGGCTTGACCAGGAAAGGAGTATATGCAGTGAGGATGAAAGTC  
AATGAGAACCCTATATGCTCCAGCTTCCGAACACGTCAATGTCTTGTGACACGCACGGAG  
GGAAGGCTAGTGTGGAACCGCTGGCCGGAGATCCGTGGATCAAGGTGCTAACTAACGTACC  
CAAAGGAACTTCACAGCCACCATTGACGAGTGGCAGGAGGAGCACGACAACATTATGAAC  
GCCATAAGAGGGGAAGTGGCGCTGACCGACCCCTTTCCAAAACAAAGCAAATGTTTGTGGGC  
AAAAGCTCTGGAACCAGTCCTTGCTACCGCTGGCATCCGACTCAGTGCAGCGGAGTGGAGCG  
ACTTGATAGTCGCTTTCAAGGAAGATAAAGCATANTCGACCGAGGTCCGCGCTAAATGAGATC  
TGCACCAGAATGTACGGGTTTGACCTAGATAGCGGCTTGTTTTCGGCTCCGCTGGTATCCATGA  
GATACGAGAACCATCACTGGGACAACCTACCGGGAGGTAAGATGTATGGATTCAACACACA  
GGCGCGCCAGCAGGCCGGAGCTCTGCAGATATCCCTTCTGCAAGGAAAATGGAGACTGAAC  
CAGCAGATCCTTTTATCGGAGAGGAGGACGCAACCAGTGAGCTCATCCGCTAACATAGTTCC  
CATTAAACCGTAGGCTGCCGCACACTCTGGTGCTGGAACACGTCAAGCTACCCGGGGACCGCG  
TAGAGCGGATCGTGATGCAAATTCGCGCGCATCACGTGCTGCTAGTGGGTGAGTATAACCTGC  
ACCTGCCTTTACGGCGTGTTACCTGGATCGCCCCCTCCCTATATACGGGGCGCAGACCGCATCT  
ACGACCTGAGCTTAGGGTTGCCAACTGACCTGGGCAGGTATGATCTGGCGTTCATAAATGTAC

ATACAGAATTCCGCAACCACCACTACCAGCAGTGTGAGGACCATGCAATGAAGTTGCAGATG  
CTAGGAGGTGACGCCCTACGCCACCTGAAACCGGGCGGATGCCTGCTGATGCGCGCCTATGG  
GTACGCAGACAGGACCAGTGAGATGGTGGTGAATGCGCTAGCGCGTAAATTCGCATCAATAC  
GCGTACTGCGACCAGTGTGTGTGGCCTCTAACACTGAAGTCTTACTGCTGCTGTCTGGGCTTTGA  
CAACGGGAAACGCCAACTGACAATGCACACATCCAACCTGAGACTCTCCAGCGTTTACTCGG  
GCAACGCACTACACACGGCAGGGTGCGCACCATCATATAGAGTCGTAAGAGGCAATATCACC  
GACTCCGACGCCGACGTGCTAGTAAATCAGTTGGGCGTGAACAACAGGGTCTGCGACGGAGT  
CTGTAGGGCCATGGTCAAGAAGTGGCCTTCTGCCTACCAACGACAACCTGGAAGAGTAGGCG  
ACGCCGTAAGTACTGACCACTGAGCCTCGAAAAATCGTGACGCTTACTGTCCTAATTTTGGAAACCA  
GTAGAGAGGAGGTTGCCGATGCCGACCTAGCAGCTGTGTATAGAGCCGTGGCGTCCTTGGCT  
GACGAGACAGTCCGCACAATGGCCATACCACTCCTGTCAACGGGGACGTTTCGCTGGGGGAAA  
GGACCGCGTGTTCAGTCGTTGAACCACCTATTTACGGCCCTGGACACCACGGACGTCGATGT  
AACGATATACTGCCGGGATAAGTCGTGGGAAAAGAAAATCCAAGAGGCCATTGATATGAGG  
ACGGCAACCGAACTGCTAGATGACGACACAACGGTGATGAAAGAGCTAACCAGGGTGCATC  
CTGATAGCTGCCTAGTGGGGCGCAGTGGATTACGACCGGTGGACGGACGGCTGCATTTCGTAC  
CTTGAAGGAACTAGGTTCCACCAGACTGCTGTGACGCTGGCAGAAATAGCCACTCTGTGGCC  
AAGGAGAGAGGAAGCGAACGAGCAGATAACACACTACGTCCTCGGCGAATCCATGGAGGCC  
ATAAGAACCAAATGCCCCGGTGGATGATACCGACTCGTCGGCACCACCATGCACCGTCCCGTG  
CCTATGCCGCTACGCCATGACCCCCGAGCGCGTACACAGATTGCGCGCCGCGCAGGTGAAGC  
AGTTCACAGTCTGCTCCTCGTTCCCGCTGCCAAAGTACAAGATACCAGGCGTGCAGAGAGTG  
GCGTGTTCCGGCTGTAATGTTGTTAATCACGACGTCCCAGCGCTGGTAAGCCCTCGCAAGTAT  
AGGGAACCGAGCATTAGCAGCGAGTCGTCATCCTCTGGACTGTCTGTGTTTCGACCTGGACATA  
GGCTCTGATTCAGAGTACGAACCAATGGAACCCGTGCAACCCGAACCGCTGATTGACTTGGC  
AGTCGTAGAAGAGACAGTCCCCGTCAGACTGGAACGGGTGGCCCCCTGTGGCTGCACCTCGCA  
GAGCCCCGCGCAGCCCTTTACTTTGGAGCAGCGGGTTGTAGCACCGGTTCTGCGCCGCGTA  
CTATGCCAGTCAGACCCCCTCGCCGGAAGAAAGCGGCGACCAGAACACCTGAAAGGATTTCG  
TTCGGCGATTTAGATGCCGAGTGCATGGCCATCATAAATGACGACCTGACTTTCGGGGACTTC  
GGCGCGGGCGAGTTTCGAACGATTAACGTCAGCATGACTAGACCGGGCGGGGGCCTACATATT  
CTCATCGGATACAGGCCCAGGACACCTACAGCAAAGATCGGTCAGGCAAACCAGACTAGCG  
GACTGCGTGGCGGAGGACGTACATGAAGAGAGAGTATTGCCCCGAAGTGTGACAAGGATA  
AGGAAAGGCTGCTGCTTTTACAAATGCAGATGGCACCTACAGAAAGCCAACAAAAGCCGCTAC  
CAATCCAGGAAAGTGGAGAACATGAAGGCAGAGGTTATCGACAGACTGTTGGGCGGAGCGA  
AATTGTTTCGTGACACCCACAACCGACTGCCGATACGTGACACACAAGCACCCAAAGCCGATG  
TACTCGACTAGCGTAGCATCCTACCTGAGTTCGGCCAAGACTGCAGTGGCAGCATGCAATGA  
ATTCTTAAGTAGGAACTACCCAACCTGTGGCATCCTATCAGATCACGGATGAGTACGACGCCTA  
CCTGGACATGGTGGACGGTTCGAGAGCTGTCTAGACAGAGCAGCCTTTTGTCCGTCNAAATT  
ACGCAGCTTTCGAAGAAGCACAGCTACCATCGAGCCGAAATAAGAAGTGCCGTTCCGTCTC  
CTTTCCAAAATACACTGCAGAACGTGCTGGCCGCTGCCACGAAACGCAACTGCAACGTGACG  
CAGATGCGGGAGCTGCCGACCTTGGATTCCGCGGTGTTTAATGTGAGTGTCTTAAGAGGTAC  
GCATGCAACAACGACTACTGGGACGAATTTGCTCAAAAGCCCATCAGGTTGACGACGGAAAA  
CATCACGTCCTACGTAAGTACTGAGTGAAGGGCCCGAAGGCAGCCGCTCTATTTGCAAAAACCT  
ACGACTTGAAGCCGTTGCAAGAGGTACCAATGGACCGCTTCGTGCTGGATATGAAGAGAGAC  
GTGAAGGTGACACCCGGCACTAAGCATACAGAAGAACGGCCAAAGGTGCAAGTCATACAGG  
CAGCCGAACCCCTAGCCACCGCCTATCTGTGCGGTATACATAGAGAACTGGTTAGAAGGTTA  
AATGCAGTTCTGCTGCCGAACGTCCACACCCTGTTTCGACATGTCGGCGGAAGACTTTGATGCT  
ATAATATCCGAGCACTTCCGCCCTGGGGACGCTGTACTAGAAACAGATATCGCATCGTTTCGAC

AAGAGCCAAGACGACTCGCTGGCGTACACGGGGCTGATGTTGCTAGAGGATCTCGGCGTCGA  
CCAGCCTTTGCTCGAGTTGATCGAAGCGTCGTTTCGGGGAAATAACAAGCACGCATTTACCAAC  
GGGCACTAGGTTCAAGTTCGGTGCCATGATGAAATCTGGCATGTTCTTGACGCTCTTCGTGAA  
TACGATGCTCAACATGACTATAGCTAGCAGAGTGTTAGAAGAACGGCTGACCAATTCCAAAT  
GTGCCGCCTTTATCGGCGATGATAACATTGTGCATGGAGTGAAATCTGATAAACTGCTTGCTG  
AGAGATGCGCCGCATGGATGAACATGGAAGTGAAGATCATCGATGCAGTCATGTGTGAGCGC  
CCCCTACTTCTGCGGAGGGTTTATCGTGTTTGACCAAGTTACAGGTACCTGTTGCAGAGTGCGG  
GACCCGCTGAAGAGACTCTTTAAGCTCGGAAAACCGCTGCCTGCTGAAGACAAACAGGACGA  
GGACCGTAGAAGGGCGTTGGCCGACGAGGCACTACGGTGGAACCGCGTAGGTATCCAAGCA  
GACTTGGAGGCCGCAATGAGCAGCCGTTACGAGGTGAGGGGATCCGAAACGTCATCACGGC  
GTTAACCACGCTGTCGCGGAATTATCACAATTTCCGCCATCTAAGAGGACCCGTTATTGACCT  
CTACGGCGGTCTAAATAGTTGCGTGAATACATATTCTAATAACAGATATTATTGACGCAGCA  
CCATGAATTACATACCTACGCAGACGTTCTACGGCCGCCGATGGCGTCCTCGCCCGGCGGCCC  
GCCCCTGGGTGGCTCCACCACCCGTATACTATCCGCCGCCACCACCCGTGCCTGTCGACCCGC  
AAGCGCAGCAAATGCAACAACCTTATTGCTGCGGTCAATACGCTGGCTATAAGGCAGAATGGC  
ACCCGAACACCTGGACAACAACGAAGGAAACGTCAACCAAACAAACCAAAGAGGAAACAG  
ACACCCCCAAAGAAACAGAACCCGGCGAAAACAAAGAACAAGCAGAAACCGCAACCACCC  
AAGCCTAAGAAACGGAACCCGGCAAGAGAGAAAGGAAATGCATGAAGATAGAGAATGAT  
TGCATATTGAGGTCAAGCTCGAAGGCAAGGTCACTGGGTACGCCTGCCTGGTAGGAGATAA  
AGTGATGAAACCAGCACACGTGAAAGGAGTCATAGATAACCCTGACCTTGCCAAGCTTGCTT  
TTAAGAAATCGAGCAAGTATGACCTTGAGTGTGCGCAAATTCGGTCCACATGAAGTCAGAT  
GCCTCGCAGTTCACCCACGAGAAACCAGAAGGTCACTACAACCTGGCACCATGGTGCAGTACA  
ATACCTGAACGGAAGATTCACCATCCCGACAGGCGCTGGGAAGCCAGGGGACAGCGGTAGG  
CCTATCTTTGACAACAAGGGTCGCGTAGTGCCATTGTGCTGGGGGGAGCCAACGAGGGAGC  
GAGGACGGCTCTATCGGTTGTACCTGGAACAAAGACATAGTTACGCGCATCACCCAGAAAG  
GAACTGAGGAGTGGAAGTGCCTGGTGACAACCTGCTTGCATCTTGAGCAATCTGACTTTGACT  
GCAGCCTGCCACCATGTGCGCCTTGCTGCTATGAAAAAGACGCAGAGGGCACCTGAGGATG  
CTAGAGGACAACGTCGATAACCCCGGATACTACGATCTCCTGGCTGCATCAACGCATTGTGAC  
GCCCCGCAGCGGCGTCGCCGACGGGGGCTAACTGAGGACTACGAGGCTTACAACTCACTAA  
GCCGTACATAGCCTATTGCTCTGACTGCGGGAATGGACAGTTTTGCTACAGCCCGATAGCTAT  
CGAGAGAGTCAGGGCCGAGGCATCGGACGGAATGCTCAAGATACAGATCTCTGCGCAAATA  
GGCCTGCAGGTGGACGGAACCTATTCGTGGACGAAAATCAGATACATGAAAGGGCACGACG  
TGGAGGACACGACAGGAACCTCGCTGGAGGTGTTACCACCGGAGAGTGTACGGTCCATGGC  
ACCATGGGGCACTTCATCGTAGCTACATGCCCCGAAGGTGACTCCTTGACAGTGGCGTTCGTT  
GATAAACATAAGGTCAGGCACGCTTGAGGATAGCATATAAGCATCGTGTCCCCGTAAGTGGG  
CAGAGAGCACTTTACGGTACGGCCACATCATGGAGTAGAATTGCCATGCACCACGTACGCCA  
TGAGAACATCAGTCACTACCGAAGAAATAGAAATGCACGTGGCGCATGACGTGCCCCGACAA  
CACCTTTTATCCAAGACCGGAAACAAAGTGAAGATAACGCCAAAAGGAAAGTCTATTGCTA  
CAACTGCACGTGTGGGTCTAAGGAGAGCGGTGTACAAAAGCAAGACAAAGAATTTGACAAC  
GCGAAGTTTCGCAGTGCCACACCATGGTGACCGCCACGATAAGTGGCAGTTTAACTCTCCTT  
ATGTCCCTAGGGCAGGCTCAGGCAAGAAAGGAAAGATCCACGTACCCTTCCCACTGAGCAAC  
TCTACGTGCAGAGTTCGTTGGCGCCTTTACCGAACACCATCCCGGCAAAGAATGGAATCACA  
TTGCAGTTGCATCCGGTCGCCCCGACGCTACTTACCTACCGCACCCCTCGGAGAGAAACCAGA  
ACACCACACAGAGTGGATATCAGAAAGTTGCGAACGTACACTCCCCGTACCTGAGGAGGGGT  
TGGAGTACACATGGGGCAATCATGCCCCGTGAGACTATGGGCACAACCTGACGACTAAGGGT  
TCAGCCCATGGGATGCCGCACGAAATCTTCTCATATTACTACGGATTGTACCCTGCCGCGACG

GTTGCAGTGTGCGTGGGGCTAGCGTGTGTGATCTTGCTGGCCCTGTCCGCGTCCTGCTGCCTGT  
GCGTGTGACGCGAGAAATAAGTGCTTGACCCCGTACGCGTTGACGCCAGGGGCGTGGTGCCG  
TGCACTTTGAGCTTATTGTGCTGCGCCCCAGAGCCAAGGCCGCAACGTTTGCGGAGACAGCG  
GCATACCTATGGGACGAGAACCAGACGGTGTCTGGATGCAATTCGCAATCCCCGTAGCATG  
CTTTATGATAGTGACATATTGCCTGCGCCACTTGATGCTGTGCTGTAGGACCGCTTCTTTTTTAG  
TGGCAGTAAGCCTGGGAATGGGGGCGATATCTGCAGAGCNTCTGAGCATAGTGTAANNCTAG  
GCACAGCGAGTCTTGTTTTAACTTNCAGANCAATACGTAACCTGAACGAATCGTTCAGTTAC  
GTATTGCTAAGGTAAAAACCAANNNGACTCGCTGACCCTAGTTCAGCACCACGGAGAGAGC  
NCTGCANGATATCGAGACCTGAAAATGATCCTTGGTCCCATATCCACCGCGTGGAGCCCCCTC  
GACCCAAAGATCGTCATCTACAAGGACGAAGTCTACAATCAGGATTATCCACCGTACGGATC  
CGGGCAACCGGGTAGATTTGGGGACTTACAGAGCAGGACCACCGAGAGTAACGATGTGTAC  
GCCAATACTGCACTGAAGCTGGCTCGTCCATCTGCCGGCACGGTGCATGTTCCATATACCCAG  
ACGCCGTCCGGGTTTAAGTATTGGCTAAAAGAAAAAGGGGACGCATTGAACCATAAGGCTCC  
TTTCGGCTGCATCATCAAGACGAACCCCGTAAGGGCAGAAAATTGTGCAGTCGGAAACATAC  
CAGTGTCTCTAGACATTCCCGACGCGGCTTTCACACGCATAGTCGACGCACCATCGTAACCG  
GCCTGAAGTGCAGAGGTGGCGACTTGCACGCACTCATCGGACTTTGGAGGCACCTTTGGTGGTGG  
AGTACAAGACCGACAAAGTGGGGACGTGTCCGTCCACTCAGAATNCAACACGGCCGTTATG  
CAGGAGACGAGTCTGTCCGTGACGATGGACGGCCGAGGCACGCTGCATTTCTCCACCGCCTC  
AGCCTCACCGTCCTTCGTACTGAAAGTGTGCAGTAGTAAAACCACTTGCACAGCAAAGTGCGT  
GCCGCCGAAGGATCACGTCGTCCCTTTTCCTGCCAACCACAACAATGTTGTGTTNCCGGACAT  
TTGCAGTACTAGGCACAGCGAGTCTTGTTTTAACTCCACCCATACGTAACCTGAACGGAGCTA  
CTGTGGTGATTGCTGTGGGATCACCATATTCTTAATAGTTACTTGCATGGCTTTTAGTAGCCAC  
TAGA

**>Wesselsbron virus (animal origin)**

AGTATATTCTGCGTGCTAGTCGTTGACGTTAGTCCGTGGAGTGAGCTTCTATTAGAGTCGTTA  
ACACGTTTGAATAATTTCTACTGAAAGGAGTAGAAGAAAGGAGATTCAATCCCAATGGCAAC  
AAAGGGGATGAATAAGTCTCGGGCTCGATCCCGAGGCGTCAATATGGTAGCGGCTAGAGTGA  
AGAACCTAGCCGTTAAAGTAAAAAACAAACAAAGTGCAAGAGGTTTGCGAGGGTT  
CCTCTTGTCTTAGTGGCCCAAATTTCTGGGCTAGAAAATAACCCCGCAGGTTAAAAGATT  
GTGGAGAATGGTGGACAAAGTGCAAGGTCTCCGATCCTGAAGAACATTAGGAACATCGTTA  
CCAATCTGATGAAGGGACTGGCTGGTCGCAAGAAAAAGCGAAGCTTGACAGTACCCTTGGTC  
CTTTTGCTGATTCCACTGATTGCTTACTCAGTACTGTACCCCGTCAACGCGGATTGGGGCTTTT  
GCTCAACGTCACCTTTGCTGACGTTGGGAAGACCTATGAGGTTGAGGGGGGCAATTGCTCTGT  
CAACACTTTGGATGCGGGCAAATGGTGTGATGATTATGTGGAGTATGAGTGCGTCACTCTCTC  
TGAGGGTGAATAACCTGACGTAACCTGGAATGTTGGTGCTACGGAGTGGACAATGTCCGTGTC  
ACCTATGGAAGATGCAAGAGTGGTGGTTACGAAGATCGAGGCGCTCTGCCGTCATAACTCC  
ACATGTAGACAAAGGACTTACTACTAGACAGGAAAAGTGGCTGCCACAAAGATTGGAGAA  
CAGCAACTGCAGAAAGTGGAAAAATGGATTATGAGGAATCCTCTCTATGCACTTGGGGCGGT  
GGCTTTAGCATACTTTGTTGGCACATCAAATGTGCAGAGGGTAGTTATTGCCATCTTGCTTCTT  
GGCATTGGACCAGCTTATTCAACACACTGCTTAGGAATTCCAAAAAGGGACTTCATAAGGGG  
ACTTGATGGAAACACCTGGGTGTCAGTGGTTTTAGAACAGGGCAGCTGCGTGACTTTGATAGC  
CGACAACAAGCCATCAGTAGATATTTGGCTGAGTTCCATAGTGGTTGATACGCCAACTCTTGT  
GAGGAAAGTTTGCTATGCGAGCTCTGTGACTGGATCGAAAGCAACTGGAGCCTGTCCAATA  
TGGGAGACGCCACATGTCTGAAGAAGGAAATGAAGAATGGGAATGCAAAAGATCATACTC

GGACCGAGGATGGGGTAACGGTTGTGGGCTTTTTGGTAAAGGAAGCATTGTGGCATGCGTAA  
CTAATTTTCATGCACACATGAAATGGAGGTTTATCAGATAGATGCCACTAAGATTGAATATAC  
CATCAGTGCCCAAGTTCACTCGGGAGCCAAGAAAGATGATTGGGTAAATCACACAAAATTGG  
TGACTTTTGTTCGACCACAGGAACATCAACTGTTGCTTTTACAGGCTATGGAAACTTTGGCTT  
AGAGTGTACGTTTCAGATGATGGTGGACCTCAGCAATTCCTATCTGGTGAAAGTAGGAACTGA  
TGCCTGGCTGGTCAACAAACAATGGGTTCACGATATTACTCTCCCATGGCAGAGTGGAACAA  
GACGACATCTGCAGAGCTCCGGCAGGTCATGGTTGACTTGGAATGAACCTTACTGATATCTTA  
GCAGAGTCACTGATGAACGCGCTAATGTCACTAGCAATACGGAACCGAACGAACCTTTCTAAC  
CTTAGCAATACGTAACCTGAACGAGCTAAGGTTAAAAGGATTCATTCCCAATGGTAACACCAG  
CACCTGCCGGAGCTCTGCAGATATCATGGCGGGAACAGAAAACCGTGGAAGGTCATCACAAC  
CAACTTATTGCTGTCAAACAATGATGAAGTGTGCGGAGATCATTACCATTGAGAGAGTTA  
CATCATCGTTGGTAATGGAGATGATAAACTTTACATACCACTGGCAAAGATCAGGAAGCACC  
ATCGGGAATCTGTTTCAGAGACAATGAAAGGAGCCCAACGCATGATTATCACAGGTGAGCACT  
CGTGGGACTTTGGCTCAACTGGAGGATTTTCTATCCATTGCAAAAGCTGTGCACACAGTCTTTG  
GTGCTGCCTTCCATGCAGTTTTTGGTGGTCTCAGTTGGATAACCAAGATATTGATTGGAGGGTT  
GCTCATCTGGCTGGGTCTCAACTCGGAGAAGTTCAATGTCAATGGGCTTCATATGCATTGGAG  
CCTTGCTGCTTGTGCTGGCCACAGGAGTTGAGCAGAAGTGGGTGCTCCTCGAGTTGGAAGCA  
CGAAATGAAATGTGGGGATGGTGTTTTTGTCTTTAAGGATTCTGATGATTGGTTTTCCAAATAC  
TCAGTGCTACATTCCAGAAGATCCAAAACAATGGCCACCTTGATTATCAAGCCCACCCAGG  
ATGGACTATATGTGGTTTGAGTTCTGTCAGCGACCTGGAACATCGAATGTGGTATTCTAGAGT  
CGACGAGATAAACGCCATCTGATGAAAATGAAGTGGATCTCACAGTGGTTGTCCAAGAATCA  
GACGTACTAAGTGAGGATCGCATGCTTCCTCGGCCAAAAAGTGAATTGAAGTATGGATGGAA  
GACTTGGGGAAAAATATCATCTTTAATCCATCTAGAAAAAATGGTACATTCATCATTGATGGA  
AAAGGAAGCAGAATACCTCTTCAACAAGAGAGTGTGGAACCTCAATACGGGTTGAGGAGTTT  
GTTACAGGAGTTTACCAGACAAGAGTCTTCATGAGACCGGAATTTGATTACACCAAACCTGTGT  
GACACGGGAACTTTGGAGCTGCTGTTAAAGGTAGCGTTTCAGCTCATGGAGACCCCATGTTCT  
GATGGAATCAGAAGAGATCAATGGCACATGGATGATCACGACCTTGGAAGTTATTTCAAATT  
ACCGTGAGTGGAATGGCCTAGTCTATTACCACACTGGATGGAGCAAAAGTGGTGGAACTAGA  
CATGTTTCAGTTACGTATTGCCCAGGAGCATTGCTAGGATCCATTACAGTAANCACCAGCACC  
TGGCTCAGGATATCAAAGGTGCAAACTAGTNACCTATGGCACAATGTCCCACCTTGAAATAAA  
ANNAGAAGAGTGCCCAAGGCACCACTGTTGTGGTAGATGAGAAGTGGCATGATAGAGCAAAG  
TCAGTAAGATCAACAACAGATAGTGGAAGATCATACTGAATGGTGTGCTCCGCAGTTGCAC  
CATGCCTCCAGTGAGTTTCTNNGGGCCTGACGGCTGCTGGTATTCCATGGAAGTTAGGCCAAA  
ACACACCAATGAAGCACATCTGGTGAAATCCTGGGTTGTTGCTTCCAAAGGAGATGTTGACCC  
TTTTCTCTGGGGCTTCTCATGTTGTTTCTCTGCAGCGACATGTTCTGATGAAGAGGTTCTCCAT  
GAGACGTATTGCTAAGTTGAAAGTCTNGTCATGCTGGGAGCGATCACATTCCGGAGCTCTGAG  
ATATCTGGATCTCCTAAGGTATGCCATAACAGTTGGAATGTACATGGCTGAGATAAACAGTGG  
AGGAGATGTACACATCTGGCTCTGCTAGCGGTTTTTCAGGTGCGGGCTGGCTTTGTTAGCATG  
CTGGCCCTAAAACGACTTTGGAGCCCTAGAGAGGGNNTTGTGGCAACATGTGGAATTGTCAT  
GGTCCAGCTTGCATTAGGAGACATATTGTCAACTGACATCATGGAATGGCTGAATGCGGCCG  
GTATGGCAGTGCTCATCATCAAATCAATTGTTGAACCTAAACGGTGTAATGCTGTGTTGCCTTT  
GCTTTGCTTGCTGACCCCACTGACTGTGGCCGAAATACAAAGGGCAGTGATGTTTGTCTGTTCC  
ATTGTGATTTTTGTACAGTTTGGCAGACTGACAGCGTCTCAACCAGNAAAACCATNCCCTTG  
GTTGCTCTGACTGTTTGCTCTTTCTTCAAATGGACTAGCCCCTTTTTAGGCATAGTTTGCTATCTT  
GCATTCACACGCCTTCCCCAGCGATCTTGGCCTCTTGGAGAGACCATGGCTGCTGTTGGGCTG  
GTTGGAGTGCTTGCTGGCATGGGACTGAAGGACATGAACGGAATGCTTGGACCAGTGGCCGT



TGGTGGAGTGTTACTAATTGTAATGAGTCTTTCAGGAAAGGTTGATGGGCTGGTAATCAAGAA  
AGTGGCTGACGTGACCTGGGATGAGGATGCTGAGATTAGTGGAGCATCACACCGTTATGATG  
TGGAACAACTGACACAGGTGAATTCAAATGTTACCGTGAAATGAAGAACNNGCTGATCAGT  
CCTGCAGTAGCTCAGGTGGGAATGAATCCTTTTGGCATTACCCTGGGAATGAATCCTTAGCAA  
TGTAACACTGAAGCGAAGTACACAGTTACGTATTGCTGGGTAAAGTTCATTCACCGGTAA  
CACAGCACCTGCCGGAGCTCTGCGGANNNTATCGGGCCCGGCCAGTATTGCAGCAAGAGGTT  
GGAGCAACCCACAGATCCAGGGCTCGGNNGTGTGCCACCATATTCATGTGAGCTACCCCTCC  
TGGGACAAGCAATGAATTTCCAGAGTCAAATAGCATGATTGAAGACGTCAAGAAAAATGTTC  
CCTCAGAACCATGGACAAAAGGGCATGAATGGATTTTAGAGGACAGACGCCCTACTGCTTGG  
TTTCTCCCCTCCATCAGGATAGCCAATTCTATCGCAAAGTGCCTCCGTAAGGCTGGACAGAAC  
AGTGGTGGTGTGCTGAATAGAAAGACCTTTGAAAAAGAGTATCCCACAATAAAGTCAAAAANG  
CCTGACTTCATACTGGCCACTGATATAGCTGAAATGGGAGCCAACTTGAAAGTGGAGCGAGT  
CATCGACTGCCGCACAGCTTACAAGCCAATTTTGGTTGATGATGCCACGAAAGTCATGGTCAA  
AGGGCCCCTGCGCATATCAGCCTCATCAGCTGCACAGCGGCGTGGAAGGATTGGGAGAGATC  
CCAACAGAGACACTGACACCTACATTTATGGAGACTCAACAACTGAGGACAATGGGCACTAT  
GTCTGTTGGACAGAAGGTTCAATGCTCTTGGACAATATGGAAATCAGGAACGGCATGATCGC  
CCCGTTATACGGAGTGGAAGGCACCAAAAACAACAAGTCCGGGAGAAACACGACTAAGA  
GAAGACCAACGGAAAGTCGTTCCGTATTGCTGGTCAAGTTACTTGACATGCCGGTTAGGTTAA  
TTCATGGTACAGCACCGCGGAGCTCTGCAGATATCAAGGTGCAGGACAGAAGCTGGTGTTTTG  
ATGGTGAGGATGACAACACCTTACTTAATGACAATGGAGAGCCAATTTTAGCCAGAAGCCCA  
GGAGGAGCCAAAAAACCCTGAAGCCCCGCTGGGTGACACCAGGGTATGCAGTGACAATG  
CATCATTAATTGATTTTATCAAATTTGCTGAAGGCCGACGTTCTGCTAGCGGGATTTTGTAGG  
CTTGCAAGGATTTCTGAATTTCTGTCTGGGAAAATGCGGGAAGCGATCGACACAGTAACAGT  
CCTATACACTAGTGACACTGGAAGTAGAGCCTACAAACACGCACTAGCAATGATGCCCCAAG  
CTACAACAATTTTCTACTGGTGATGCTGGCTATCATTTGTACATCTGGGGTCATCATGTTTTT  
TTGGCTCCAAAAGGACTAAGCAGGATGTCAATGGCAATGATGACAATGCTGGTGTCTGCCTAT  
CTTATGTCATTGGGAGGAATGAACCCTGTCCAGATTTCTTGTGTCATGTTGGTATTTTTCATTTT  
CATGGTGGTGCTAATTCCAGAACCAGGACACAGAGATCTACCTATGACAATCAAATCATCT  
ACTTGTGGTAGGGGTGCTGAGCTTAATTCTCTTAGTGGCCGCAAATGAAATGGAAGTCTGG  
AAAAACAAGGATATTTTGGAGCTGTGGTGGTCGAGGAGGCTAAAAGATGGACATTT  
CCTGAGTTCGACCTACGCCAGGAGCAGCTGGACTGTCTACGTCCGGGCTTGTACTCCTGGT  
AACCCCATGCTCCACCATTTGGATAAAAATTGATTACGGGAACATTTCTCTGTCTGGCATAACA  
CAAAATGCACAGGTGCTGGGACTCATGGATAGAGGCATACCCTTCATCAAAATGAACATGTC  
AGTGGTCATTCTCCTCCTGAGTGATGGAATGGAATAACTCTGCTACCACTTTTCGCAGGTATG  
GGAGCAGCTGCACTCCATTGGGGTTTCATCCTACCGGGACTCCGAGCACAGGCCGCTAAAGC  
TGCACAAAAAAGAGTTTACCATGGGGTGGCAAAGAATCCAGTGGTTGATGGGAATCCAACAG  
TGGATATTGATGATGCTCCTGGCATGCCGGCCATGTATGAAAAGAAATTGGCCTTGGTGATTT  
TGCTGGCGCTTTCAATCTTGAACCTGGTTTTGACCAGAACCCCTTTGCAACGGCTGAAATGGT  
TGTGCTAGGCTCAGCGGCGGTAGGACCACTCATTGAGGGCGACACCAATGCTTATTGGAATG  
GACCTATTGCTGTAGCGTTTTTCAAGGATTGATGAGAGGAACTACTATGCAACCATTGGACTTG  
CCTACAATGGATGGTTGGCCAAACAGACAAGGAGAGGCAAAGCAGCTGGAGTGACCCTGGG  
GGAAGTTTGAAGAGGCAGCTGAACATGTTAGGGAAACAAGAATCTGAGAGGTACAAGGTG  
CCAGACATTACTGAAGTGGACCGAACCGCAGCTATGCGTTACCTGAAAGAAGGACGAACAG  
ATGTGGGAATCAGCGTCTCTCGAGGAGCAGCCAAAATCAGATGGCTTCACGAGCGCGGCTAC  
CTCAGAATCACAGGACGTGTCCTGGACCTTGATGCGGACGCGGTGGATGGTCATATTACGCT  
GCCGCGCAGAAGGAAGTCATGAGCGTCAAAGGTTACACACTAGGAATTGAGGGTCATGAGA

AACCAATCCACATGCAAACATTGGGATGGAACATTGTCAAGTTCAAAGATAAGTCAAATGTG  
TTCACCATGCCAACTGAACCAAGTGACACCTTACTCTGTGACATAGGTGAGTCTTCATCAAAT  
CCCTTGGTTGAGAGGGACAGGACCATGAAAGTGTGGAATAATTTGAACGATGGAAACACGT  
GAACACAGAAAATTTTGTGTCAAAGTGTGGCTCCCTATCATCCAGATGTGATTGAGAAGCT  
GGAAAGACTGCAATTGAGGTTTGGTGGTGAATTGTGAGGGTTCCATTTTCCAGAAATTCGAC  
TCATGAAATGTACTACATATCAGGAGCCCCGAATAACATCACTCACATGGTCAACACAACAT  
CAAGGAGTTTGCTAAGAAGAATGACTCGGCCTAGTGGGAAAGCCATCATAGAAGGGGACGT  
GTTTCTTCCCACTGGAACGCGAAGCGTTGCCAGTGAAACAGGCACCATAGACCATGAGGCGC  
TCAAGCTCAGAGTTAACCAGATTAAGGCAGAGTACTCAAGGACTTGGATACATGATTCAAAC  
CTGCCATATCGAAAATGGCATTATCTAGGAATGAATCCTGTACCTATAGCAAAGCAACCGGC  
AGTTCATCTTCAATGATCAATGGCATTGTCAAAGAAATGCTGTGATGCCATAGGACAAATTC  
AAATCTCGTGACTCTTCATGGCAAGTGACTCGACACAACCCCGTTTGGGCAGCAANGGGTGT  
TAAAGAGTAAAGTGGATTCACAGAAAGCCCCACCTACCCGACCTCTGCAGAGAACACGTGCG  
ATCATGCGTGTGTCAATGCTTGGTTGTTCACACCTCGCTCGTAAGAAGAAGCCCCGCATTT  
GCACGCGTGAAGAGTTTGTGGCCAAAGTTCGTAGCCATGCCGCCCTTGGAGCGTATCTCGAAG  
AGCAGGACAAATGGAAGAGTGCAAGTGAGGCTGTCCAGGATCCACAGTTCTGGAAACTGGTT  
GATGATGAGAGGAAGCTGCATCTGCAAGGCCAATGCCGGACATGTGTGTACAACATGATGGG  
GAAACGTGAAAAGAAACCCTCTGAATTTGGCAAAGCAAAGGGAAGCAGGGCGATCTGGTAC  
ATGTGGCTAGGAGCTAGATTCTTGAGTTTGAAGCACTGGGATTCTTAAATGAAGACCACTGG  
GTGTCCGGAGAGAACTCAGGGGAGGGGTGGAAGGAACAGGCTTACAGTACCTTGGCTACATA  
CTGAAGGAACTGGGTGGCAAAACAGGAGGAAACATGTATGCAGATGACACAGCCGGATGGG  
ACACAAGGATCACGGAAGAAGACCTGGAGGATGAGCAAGAGATTCTAAAATACATGGATGA  
AAAACACAAAAAACTGGCTTGGGCTGTGACGGAGTTGGCATACAAAAACAAGGTAGTCAAA  
GTGATGCGTCCTGGCCCTGGAGGGTTGACCTTCATGGACATTATTTCAAGAAGGGATCAAAGA  
GGGTCCGGGCAAGTGGTCACTTATGCCCTGAACACCGTGACTAATCTTAAGGTTCAACTCATA  
CGCATGGCGGAGGCAGAGCATGTCATTACAAATTTTGATGTTGACACAGTTAGCCAGAAGAC  
CCTGCAGGACTTGAGATGCTGGCTTGACAGATTTNGTNCAGATCGCTTGTCCAGGATGGCAGT  
CAGTGGTGATGACTGTGTAGTGAAGCCCATTGATGACCAATTCGCCGATGCACTGACCCACTT  
GAATTCCATGTCAAAGATTAGGAAAGATATAGATGACTGGAAACCATCCCAAGGCTGGGCCT  
CGTGGGAGGATGTCCCATTTCTGTTCCCACTTCCATGAACTGATCCTAAAGGATGGACGGT  
CGATAATAGCACCATGCCGTGATCAGGATGAGCTCATAGGGAGGGCCCCGTGTGTCCCTGGA  
AATGGATGGATGATCAGAGAAACAGCCTGCCTTAGCAAGGCATATGCACAAATGTGGCTGTT  
GATGTATTTCCACCGCAGAGACCTTAGAGTTATGGCCAACGCAATCAACTCGACCGTTCTGT  
GGATTGGGTTCCAACTGGAAGGACAACATGGTCTATTCATGGAAAGGGAGAATGGATGACCA  
CTGAAGACATGCTGCAGGTGTGGAACAGAGTTTGGATAGAAGACAATCCACATCAGACTGAC  
AAAACACCAATCACTGAGTGGCGAGACATTCCTTATCTGCCAAAGTCAATTGACAAGACATG  
CAACTCACTCGTTGGAACCACACAACGAGCTTCCTGGGCTAGAGATATCAAGCACACAGTCC  
ATAGAATCCGTGGACTTGTTGGAAATGAAAAATATACAGACTATCTAGCCACTATGGACAGA  
TTCAGGGAACCTCGATGAGAGTGGCCCTGGAGAAGTCTTGTGGTAAATTCAACAAAATTTAAG  
AAACCGGGATACAAACCACGGATCCAGAACCGGACTGGGTCACCTATTGAATAAAACCGGG  
ATATAAACACCGGAGAGGACCGGACCTCTCACTCTGTAAAACCGGGATATAAACGAGCAAG  
CAGGACCGGACCTGCTTTTAGAGTCAGCCCATCATTTGATGCCATGGCTAAGCTGTGAGGCCA  
TGCTGGCTGGGACAGCCGCGACCAACCCGCGCAAAGGGGTTCTGGTAGGCTCAAACCAGGGT  
AAAAAGTATTGGGAGCCTCCACCCACCGTTACCGCGCACGGTGGGAAAGATGGGGTCTAGAG  
GTTAGAGGAGACCCNTNCCCTCCCGAGCACACATAGCGGACCATATTGACGCCAGGGAAAG

ACCGGAGACACTCCTTGATTCTGACCTTTCTAGCAATACGTAAAGAACAGACGAAACTGAAT  
GCAGAGCTCCGGCAGGTGCTGGTGTT

| Segment | Accession No. |
|---------|---------------|
| L       | NC_005301.3   |
| M       | NC_005300.2   |
| S       | NC_005302.1   |

**Suppl. Table S3 Reference sequences used for the genome assembly (de-novo and map-to-reference)**

**3.1 CCHFV**

**3.2 RVFV**

| Segment | Accession No. |
|---------|---------------|
| L       | NC_014397.1   |
| M       | NC_014396.1   |
| S       | NC_014395.1   |

### **3.3 DUGV**

| <b>Segment</b> | <b>Accession No.</b> |
|----------------|----------------------|
| L              | NC_004159.1          |
| M              | NC_004158.1          |
| S              | NC_004157.1          |

### **3.4 NSDV**

| <b>Segment</b> | <b>Accession No.</b> |
|----------------|----------------------|
| L              | NC_034387.1          |
| M              | NC_034391.1          |
| S              | NC_034386.1          |

### **3.5 MIDV**

NC\_024887.1

### **3.6 WSLV**

NC\_012735.1
